# Supplementary material for: The COVID-19 pandemic and child malnutrition in sub-Saharan Africa: A scoping review
Source: bioRxiv or medRxiv preprint supplement (doi:10.1101/2021.07.21.21260929), 2021-07-23
Supplement: Supplementary file [file media-1.pdf]

## Additional File 1 – Search Strategy

| Databases                                                   | Search Syntax [Title/Abstract]                                                                                                                                                                                                                                                                                                                                                                                                                                                                                                                                                                                                                                                                                                                                                                                                                                                                                                                                                                                                                                                                                                                                                                                                                                                                                                                                                                                 |
|-------------------------------------------------------------|----------------------------------------------------------------------------------------------------------------------------------------------------------------------------------------------------------------------------------------------------------------------------------------------------------------------------------------------------------------------------------------------------------------------------------------------------------------------------------------------------------------------------------------------------------------------------------------------------------------------------------------------------------------------------------------------------------------------------------------------------------------------------------------------------------------------------------------------------------------------------------------------------------------------------------------------------------------------------------------------------------------------------------------------------------------------------------------------------------------------------------------------------------------------------------------------------------------------------------------------------------------------------------------------------------------------------------------------------------------------------------------------------------------|
| Covid-19 Literature-Clustering Tool - PubMed, Medline, etc. | ('coronavirus' OR 'covid-19' OR 'covid' OR 'sars2' OR 'sars-cov' OR 'sars-cov-2' OR 'ncov' OR 'cov2' OR 'severe acute respiratory pneumonia outbreak' OR 'coronaviridae' OR 'corona virus')<br>AND<br>('children' OR 'child' OR 'infant' OR 'infants' OR 'pediatric' OR 'paediatric' OR 'nursery' OR 'kindergarten' OR 'kid' OR 'kids' OR 'toddler' OR 'toddlers' OR 'adolescent' OR 'adolescents' OR 'babies' OR ,baby')<br>AND<br>('Africa' OR 'africa' OR 'SSA' OR 'ssa' OR 'SSA countries' OR 'Angola' OR 'Burundi' OR 'Congo' OR 'Cameroon' OR 'Chad' OR 'Guinea' OR 'Gabon' OR 'Kenya' OR 'Nigeria' OR 'Rwanda' OR 'Sao' OR 'Tanzania' OR 'Uganda' OR 'Sudan' OR 'Djibouti' OR 'Eritrea' OR 'Ethiopia' OR 'Somalia' OR 'Botswana' OR 'Comoros' OR 'Lesotho' OR 'Madagascar' OR 'Malawi' OR 'Mauritius' OR 'Mozambique' OR 'Namibia' OR 'Seychelles' OR 'Swaziland' OR 'Zambia' OR 'Zimbabwe' OR 'Benin' OR 'Mali' OR 'Burkina' OR 'Verde' OR 'Ivory' OR 'Gambia' OR 'Ghana' OR 'Liberia' OR 'Mauritania' OR 'Niger' OR 'Senegal' OR 'Leone' OR ,Togo')<br>AND<br>('malnutrition' OR 'undernourishment' OR 'hunger' OR 'famine' OR 'starvation' OR 'poor diet' OR 'lack of food' OR 'malnourishment' OR 'inadequate diet' OR 'stunting' OR 'wasting' OR 'undernutrition' OR 'food systems' OR 'household-income' OR 'food security' OR 'food insecurity' OR 'food affordability' OR 'food accessibility') |
