# Supplementary material for: The COVID-19 pandemic and child malnutrition in sub-Saharan Africa: A scoping review
Source: bioRxiv or medRxiv preprint supplement (doi:10.1101/2021.07.21.21260929), 2021-07-23
Supplement: Supplementary file [file media-3.pdf]

## Hand- and Snowball Search

| Title                                                                                    | Authors                                                                                  | Date       | Journal          | URL                                                                                                                                             | Abstract                                                                                                                                                                                                                                                                                                                                                                                                                                                                                                                                                                                                                                                                                                                                                                                                                                                                       |
|------------------------------------------------------------------------------------------|------------------------------------------------------------------------------------------|------------|------------------|-------------------------------------------------------------------------------------------------------------------------------------------------|--------------------------------------------------------------------------------------------------------------------------------------------------------------------------------------------------------------------------------------------------------------------------------------------------------------------------------------------------------------------------------------------------------------------------------------------------------------------------------------------------------------------------------------------------------------------------------------------------------------------------------------------------------------------------------------------------------------------------------------------------------------------------------------------------------------------------------------------------------------------------------|
| Child malnutrition and COVID-19: the time to act is now                                  | Fore, H. H., Dongyu, Q., Beasley, D. M., & Ghebreyesus, T. A.                            | 2020-08-22 | The Lancet       | <a href="https://www.thelancet.com/article/S0140-6736(20)31648-2/fulltext">https://www.thelancet.com/article/S0140-6736(20)31648-2/fulltext</a> | The COVID-19 pandemic is undermining nutrition across the world, particularly in low-income and middle-income countries (LMICs). <sup>1</sup> The worst consequences are borne by young children. Some of the strategies to respond to COVID-19—including physical distancing, school closures, trade restrictions, and country lockdowns—are impacting food systems by disrupting the production, transportation, and sale of nutritious, fresh, and affordable foods, forcing millions of families to rely on nutrient-poor alternatives. Strained health systems and interruptions in humanitarian response are eroding access to essential and often life-saving nutrition services. <sup>2</sup> Social protection systems in many LMICs are overloaded as vulnerable families struggle to access the food and services they need in the context of an economic downturn. |
| Impacts of COVID-19 on childhood malnutrition and nutrition-related mortality            | Headey, D., Heidkamp, R., Osendarp, S., Ruel, M., Scott, N., Black, R., ... & Walker, N. | 2020-07-27 | The Lancet       | <a href="https://doi.org/10.1016/S0140-6736(20)31647-0">https://doi.org/10.1016/S0140-6736(20)31647-0</a>                                       | The unprecedented global social and economic crisis triggered by the COVID-19 pandemic poses grave risks to the nutritional status and survival of young children in low-income and middle-income countries (LMICs). Of particular concern is an expected increase in child malnutrition, including wasting, due to steep declines in household incomes, changes in the availability and affordability of nutritious foods, and interruptions to health, nutrition, and social protection services. <sup>1</sup>                                                                                                                                                                                                                                                                                                                                                               |
| Is the effect of COVID-19 on children underestimated in low-and middle-income countries? | Simba, J., Sinha, I., Mburugu, P., Agweyu, A., Emadau, C., Akech, S., ... & English, M.  | 2020-06-18 | Acta Paediatrica | <a href="https://doi.org/10.1111/apa.15419">https://doi.org/10.1111/apa.15419</a>                                                               | The COVID-19 pandemic has had a huge impact on health and society, worldwide. While most high-income countries are felt to be reaching their COVID-19 peak, most low- and middle-income countries (LMICs), particularly sub-Saharan countries, are anticipating an exponential growth of cases. <sup>1</sup> Overall it has been documented that children are less affected. <sup>2</sup> However, in this commentary we describe how in Kenya, a LMIC in sub-Saharan Africa, COVID-19 is likely to have far-reaching direct and indirect implications on children. Of all confirmed cases of COVID-19, only around 1%-5% are children. <sup>2</sup> In Kenya, the first case of COVID-19 was diagnosed on 13th March 2020; one month later, six children aged between one and 15 years (2.7% out                                                                              |

|                                                                                                                  |                                                                                                                           |                   |                                    |                                                                                                                            |                                                                                                                                                                                                                                                                                                                                                                                                                                                                                                                                                                                                                                                                                                                                                                                                                                                                                                                                                                                                                                                                                                                                                                                                                                                                                                                                                                                                                                                                                                                     |
|------------------------------------------------------------------------------------------------------------------|---------------------------------------------------------------------------------------------------------------------------|-------------------|------------------------------------|----------------------------------------------------------------------------------------------------------------------------|---------------------------------------------------------------------------------------------------------------------------------------------------------------------------------------------------------------------------------------------------------------------------------------------------------------------------------------------------------------------------------------------------------------------------------------------------------------------------------------------------------------------------------------------------------------------------------------------------------------------------------------------------------------------------------------------------------------------------------------------------------------------------------------------------------------------------------------------------------------------------------------------------------------------------------------------------------------------------------------------------------------------------------------------------------------------------------------------------------------------------------------------------------------------------------------------------------------------------------------------------------------------------------------------------------------------------------------------------------------------------------------------------------------------------------------------------------------------------------------------------------------------|
|                                                                                                                  |                                                                                                                           |                   |                                    |                                                                                                                            | <p>of 216 total cases) have been diagnosed with the infection according to the Ministry of Health Kenya, COVID-19 Daily Situation Report as at 13th April 2020. Although most have had mild illness, there has been one reported death of a child with underlying comorbidity. As testing for COVID-19 in children is very limited, and children being excluded from mass testing, it is difficult to be confident in the numbers. Collecting nasopharyngeal or oropharyngeal swabs requires the patient to be cooperative, which is difficult to achieve in young children, as well as acute respiratory infections (ARIs), are so common in children that index of suspicion of COVID-19 is low, these pose unique challenges in children. It is therefore imperative that other methods of estimating the burden of COVID-19 in LMICs may have to be utilised including syndromic surveillance as well as modelling data. However, modelling in COVID-19 has led to different predictions depending on assumptions made.<sup>3</sup> It is therefore difficult to tell which path the pandemic will follow in reality.</p>                                                                                                                                                                                                                                                                                                                                                                                       |
| <p>Things must not fall apart: the ripple effects of the COVID-19 pandemic on children in sub-Saharan Africa</p> | <p>Modupe Coker, Morenike O. Folayan, Ian C. Michelow, Regina E. Oladokun, Nguavese Torbunde &amp; Nadia A. Sam-Agudu</p> | <p>2020-09-24</p> | <p>Nature - Pediatric Research</p> | <p><a href="https://www.nature.com/articles/s41390-020-01174-y">https://www.nature.com/articles/s41390-020-01174-y</a></p> | <p>Zero to 19 year-old children in sub-Saharan Africa bear a disproportionate proportion of the global burden of communicable and non-communicable diseases. Significant public health gains have been made in the fight against these diseases, however, factors such as under-equipped health systems, disease outbreaks, conflict, and political instability continue to challenge prevention and control. The novel coronavirus disease (COVID-19) pandemic caused by severe acute respiratory syndrome coronavirus 2 (SARS-CoV-2) introduces new challenges to public health programs in sub-Saharan Africa. Of particular concern are programs targeting major conditions among children, such as undernutrition, vaccine-preventable pneumonia and diarrhea, malaria, tuberculosis, HIV, and sickle cell disease. This article focuses on the impact of the COVID-19 pandemic on child health in sub-Saharan Africa. We review the epidemiology of major pediatric diseases and, referencing modeling projections, discuss the short- and long-term impact of the pandemic on major disease control. We deliberate on potential complications of SARS-CoV-2 co-infections/comorbidities and identify critical social and ethical issues. Furthermore, we highlight the paucity of COVID-19 data and clinical trials in this region and the lack of child participants in ongoing studies. Lastly, approaches and interventions to mitigate the pandemic's impact on child health outcomes are discussed.</p> |

|                                                                        |                                                  |            |                      |                                                                                                     |                                                                                                                                                                                                                                                                                                                                                                                                                                                                                                                                                                                                                                                                                                                                                                                                                                                                                                                                                                                                                                                                                                                                                                                                                                                                                                                                                                                                                                                                                                                                                                                                                                                                                                                                                                                                                                                                                                                                                                                                                                                                                    |
|------------------------------------------------------------------------|--------------------------------------------------|------------|----------------------|-----------------------------------------------------------------------------------------------------|------------------------------------------------------------------------------------------------------------------------------------------------------------------------------------------------------------------------------------------------------------------------------------------------------------------------------------------------------------------------------------------------------------------------------------------------------------------------------------------------------------------------------------------------------------------------------------------------------------------------------------------------------------------------------------------------------------------------------------------------------------------------------------------------------------------------------------------------------------------------------------------------------------------------------------------------------------------------------------------------------------------------------------------------------------------------------------------------------------------------------------------------------------------------------------------------------------------------------------------------------------------------------------------------------------------------------------------------------------------------------------------------------------------------------------------------------------------------------------------------------------------------------------------------------------------------------------------------------------------------------------------------------------------------------------------------------------------------------------------------------------------------------------------------------------------------------------------------------------------------------------------------------------------------------------------------------------------------------------------------------------------------------------------------------------------------------------|
| Challenges of COVID-19 in children in low- and middle-income countries | Zar HJ, Dawa J, Fischer GB, Castro-Rodriguez JA. | 2020-06-25 | Paediatr Respir Rev. | <a href="https://doi.org/10.1016/j.prrv.2020.06.016">https://doi.org/10.1016/j.prrv.2020.06.016</a> | <p>As the coronavirus pandemic extends to low and middle income countries (LMICs), there are growing concerns about the risk of coronavirus disease (COVID-19) in populations with high prevalence of comorbidities, the impact on health and economies more broadly and the capacity of existing health systems to manage the additional burden of COVID-19. The direct effects of COVID are less of a concern in children, who seem to be largely asymptomatic or to develop mild illness as occurs in high income countries; however children in LMICs constitute a high proportion of the population and may have a high prevalence of risk factors for severe lower respiratory infection such as HIV or malnutrition. Further diversion of resources from child health to address the pandemic among adults may further impact on care for children. Poor living conditions in LMICs including lack of sanitation, running water and overcrowding may facilitate transmission of SARS-CoV-2. The indirect effects of the pandemic on child health are of considerable concern, including increasing poverty levels, disrupted schooling, lack of access to school feeding schemes, reduced access to health facilities and interruptions in vaccination and other child health programs. Further challenges in LMICs include the inability to implement effective public health measures such as social distancing, hand hygiene, timely identification of infected people with self-isolation and universal use of masks. Lack of adequate personal protective equipment, especially N95 masks is a key concern for health care worker protection. While continued schooling is crucial for children in LMICs, provision of safe environments is especially challenging in overcrowded resource constrained schools. The current crisis is a harsh reminder of the global inequity in health in LMICs. The pandemic highlights key challenges to the provision of health in LMICs, but also provides opportunities to strengthen child health broadly in such settings.</p> |
| A Crisis within a Crisis: COVID-19 and Hunger in African Children      | Aborode AT, Ogunsola SO, Adeyemo AO. A           | 2020-01    | Am J Trop Med Hyg.   | <a href="https://doi.org/10.4269/ajtmh.20-1213">https://doi.org/10.4269/ajtmh.20-1213</a>           | <p>The WHO recently expressed concern at the potential impact of COVID-19 on hunger, which is likely to exacerbate the already considerable burden of malnutrition of Africa. The impact of the disease is expected to be greater among those grappling with malnutrition, whereas widespread hunger and malnutrition will likely increase because of movement restrictions. COVID-19 is unfolding in</p>                                                                                                                                                                                                                                                                                                                                                                                                                                                                                                                                                                                                                                                                                                                                                                                                                                                                                                                                                                                                                                                                                                                                                                                                                                                                                                                                                                                                                                                                                                                                                                                                                                                                          |

|                                                                                                   |                    |            |                     |                                                                                                   |                                                                                                                                                                                                                                                                                                                                                                                                                                                                                                                                                                                                                                                                                                                                                                                                                                                                                                                                                                                                                                                                                                                                                                                                                                                                                                                                                                                                                                                                                                                                                                                                                                                                                                                                                                                                                                                                                                                                                                                       |
|---------------------------------------------------------------------------------------------------|--------------------|------------|---------------------|---------------------------------------------------------------------------------------------------|---------------------------------------------------------------------------------------------------------------------------------------------------------------------------------------------------------------------------------------------------------------------------------------------------------------------------------------------------------------------------------------------------------------------------------------------------------------------------------------------------------------------------------------------------------------------------------------------------------------------------------------------------------------------------------------------------------------------------------------------------------------------------------------------------------------------------------------------------------------------------------------------------------------------------------------------------------------------------------------------------------------------------------------------------------------------------------------------------------------------------------------------------------------------------------------------------------------------------------------------------------------------------------------------------------------------------------------------------------------------------------------------------------------------------------------------------------------------------------------------------------------------------------------------------------------------------------------------------------------------------------------------------------------------------------------------------------------------------------------------------------------------------------------------------------------------------------------------------------------------------------------------------------------------------------------------------------------------------------------|
|                                                                                                   |                    |            |                     |                                                                                                   | Africa against a backdrop of worrying levels of hunger and undernourishment which could worsen as the virus threatens livelihoods and household economies. The perspective piece addresses the crisis within crisis of COVID-19 and hunger on the well-being of children in Africa.                                                                                                                                                                                                                                                                                                                                                                                                                                                                                                                                                                                                                                                                                                                                                                                                                                                                                                                                                                                                                                                                                                                                                                                                                                                                                                                                                                                                                                                                                                                                                                                                                                                                                                   |
| The risk to child nutrition during and after COVID-19 pandemic: what to expect and how to respond | Ntambara J, Chu M. | 2021-04-13 | Public Health Nutr. | <a href="https://doi.org/10.1017/s1368980021001610">https://doi.org/10.1017/s1368980021001610</a> | <p>Objective: This study aimed to address the key areas of concern for child nutrition, both during and after the COVID-19 pandemic, and proposes strategic responses to reduce child undernutrition in the short and long term.</p> <p>Design: A descriptive literature review was performed. The search of the literature was conducted through using electronic databases including PubMed, Web of science, google scholar, and Cochrane library.</p> <p>Setting: A wide range of published articles focused on child malnutrition were reviewed.</p> <p>Participants: The study was focused on children especially those under five years.</p> <p>Results: This study proposes strategic responses to reduce child undernutrition. These responses include strengthening access to community-based nutrition services that support the early detection and treatment of undernourished children and emergency food distribution, including fortified foods with vitamins and minerals, to vulnerable households, particularly those with children under five years. Moreover, counseling and promotion programs should be reinforced to revitalize community nutrition education in areas such as gestation, exclusive breastfeeding, and complementary feeding, and hygienic practices involving handwashing, proper sanitation, and other basic behavioral changes.</p> <p>Conclusions: The COVID-19 pandemic has affected many countries especially those in the regions of South Asia and sub-Saharan Africa in which there has been an ongoing burden of child undernutrition. However, malnutrition is preventable and can be eliminated through a multisectoral strategic approach. The effective execution of a multisectoral approach toward preventing childhood malnutrition will require not only a financial investment but also the collective efforts from different ministries of the governments, UN-affiliated agencies, and nongovernmental organizations.</p> |

|                                                                                              |                                                                  |                   |                           |                                                                                                                        |                                                                                                                                                                                                                                                                                                                                                                                                                                                                                                                                                                                                                                                                                                                                                                                                                                                                                                                                                                                                                                                                                                                                                                                                                                                                                                                                                                                                                   |
|----------------------------------------------------------------------------------------------|------------------------------------------------------------------|-------------------|---------------------------|------------------------------------------------------------------------------------------------------------------------|-------------------------------------------------------------------------------------------------------------------------------------------------------------------------------------------------------------------------------------------------------------------------------------------------------------------------------------------------------------------------------------------------------------------------------------------------------------------------------------------------------------------------------------------------------------------------------------------------------------------------------------------------------------------------------------------------------------------------------------------------------------------------------------------------------------------------------------------------------------------------------------------------------------------------------------------------------------------------------------------------------------------------------------------------------------------------------------------------------------------------------------------------------------------------------------------------------------------------------------------------------------------------------------------------------------------------------------------------------------------------------------------------------------------|
| <p>Child Undernutrition in Sudan: The Social and Economic Impact and Future Perspectives</p> | <p>Abu-Fatima O, Abbas AAG, Racalbutto V, Smith L, Pizzol D.</p> | <p>2021-03-01</p> | <p>Am J Trop Med Hyg.</p> | <p><a href="https://doi.org/10.4269/ajtmh.20-1251">https://doi.org/10.4269/ajtmh.20-1251</a></p>                       | <p>The nutrition situation in Sudan is one of the worst in northeast Africa and it is characterized by persistently high levels of acute and chronic malnutrition that have increased over the last two decades. The underlying causes of malnutrition are multi-sectoral and are mainly due to inequalities, inadequate food practices, and limited access to healthcare services. Based on the report The Economic and Social Impacts of Child Undernutrition in Sudan, this study assesses the impact that malnutrition has on health, education, and productivity in Sudan. The country is estimated to have lost an equivalent of about 11.6 billion Sudanese pound in 2014, which represented 2.6% of the gross domestic product (GDP). Productivity-related losses contributed the largest costs at 1.5% of GDP followed by health and education sectors at 1.1% and 0.1%, respectively. In 2020, the outbreak of the COVID-19 pandemic further exposed the fragility of Sudan's health, social, and economic system. It is mandatory that all stakeholders address child nutrition as a main concern and stunting is incorporated in the center of the development agenda. In particular, the national development frameworks should be updated to ensure the reduction of the stunting prevalence and to put in place a comprehensive multi-sectoral nutrition policy, strategy, and plan of action.</p> |
| <p>The implications of COVID-19 for the children of Africa.</p>                              | <p>Mustafa, F., &amp; J Green, R.</p>                            | <p>2020-06</p>    | <p>Afr. med. j.</p>       | <p><a href="http://dx.doi.org/10.7196/SAMJ.2020.v110i6.14824">http://dx.doi.org/10.7196/SAMJ.2020.v110i6.14824</a></p> | <p>COVID-19, and the novel coronavirus causing it, has been declared a pandemic by the World Health Organization. It presents with signs and symptoms of respiratory illness, and other nonspecific symptoms. These symptoms may be mild enough to go unnoticed, or severe enough to overwhelm a healthcare system in a First-World country. It is an emerging problem that can potentially put intolerable strain on a health system that is fragile and likely to collapse, such as those that exist in Africa. Extraordinary times like these require ingenious statesmanship and astutely calculated plans to see a nation emerge through the crisis. And in such a crisis, special attention needs to be directed to the healthcare system, where medical attention, equipment and interventions need to be carefully rationed.</p> <p>To date, sub-Saharan Africa has not seen the devastation wrought on the Northern Hemisphere. That may be fortuitous, we may be lucky, it may just be coming.</p>                                                                                                                                                                                                                                                                                                                                                                                                      |

|                                                                                                  |                                                                                |            |                                                 |                                                                                                                                                                                                                                                                                                                                           |                                                                                                                                                                                                                                                                                                                                                                                                                                                                                                                                                                                                                                                                                                                                                                                                                                                                                                                                                                                                                                                                                                                                                                                                                         |
|--------------------------------------------------------------------------------------------------|--------------------------------------------------------------------------------|------------|-------------------------------------------------|-------------------------------------------------------------------------------------------------------------------------------------------------------------------------------------------------------------------------------------------------------------------------------------------------------------------------------------------|-------------------------------------------------------------------------------------------------------------------------------------------------------------------------------------------------------------------------------------------------------------------------------------------------------------------------------------------------------------------------------------------------------------------------------------------------------------------------------------------------------------------------------------------------------------------------------------------------------------------------------------------------------------------------------------------------------------------------------------------------------------------------------------------------------------------------------------------------------------------------------------------------------------------------------------------------------------------------------------------------------------------------------------------------------------------------------------------------------------------------------------------------------------------------------------------------------------------------|
|                                                                                                  |                                                                                |            |                                                 |                                                                                                                                                                                                                                                                                                                                           | In addition, SARS-CoV-2 has left children largely unaffected by disease.[1] They may be the silent carriers, which could have its own awful psychological impact. But whether or not COVID-19 ultimately affects the children of Africa directly, it will leave them scarred, worse off, and still facing a burden of infectious diseases not seen anywhere else in the world.                                                                                                                                                                                                                                                                                                                                                                                                                                                                                                                                                                                                                                                                                                                                                                                                                                          |
| Assessing the Zero Hunger Target Readiness in Africa in the face of COVID-19 Pandemic            | Otekunrin, O. A., Otekunrin, O. A., Fasina, F. O., Omotayo, A. O., & Akram, M. | 2020-07-15 | Caraka Tani: Journal of Sustainable Agriculture | <a href="https://scholar.googleusercontent.com/scholar?q=cache:Dh_gtOWa9tUJ:scholar.google.com/+covid-19+and+malnutrition+in+african+children&amp;hl=de&amp;as_sdt=0,5">https://scholar.googleusercontent.com/scholar?q=cache:Dh_gtOWa9tUJ:scholar.google.com/+covid-19+and+malnutrition+in+african+children&amp;hl=de&amp;as_sdt=0,5</a> | Sustainable Development Goal 2 (SDG 2) is hinged on achieving zero hunger target globally, by the year 2030. Many developing countries, especially African countries, are faced with extreme hunger often caused or compounded by bad governance, conflicts and climate change. In this paper, we assess Africa's readiness towards attaining the zero hunger target by 2030 in the face of COVID-19 pandemic. Patterns of Global Hunger Index (GHI) and each of its indicators across Africa are compared before the pandemic (2000-2019). The effect of the pandemic on the hunger situation in Africa is discussed highlighting the mitigating measures put in place by selected African governments. We found that most African countries have recorded steady reduction in their child mortality rates but high prevalence of undernourishment, stunting and child wasting indicate significant challenges hampering the achievement of the zero hunger target. The study recommends that African governments should prioritise sustainable agricultural practices while serious attention should be given to the formulation and implementation of policies that reduce hunger in the face the COVID-19 pandemic. |
| COVID-19 implications on household income and food security in Kenya and Uganda: Findings from a | Kansiime, M. K., Tambo, J. A., Mugambi, I., Bundi, M., Kara, A., & Owuor, C.   | 2021-01    | World development                               | <a href="https://doi.org/10.1016/j.worlddev.2020.105199">https://doi.org/10.1016/j.worlddev.2020.105199</a>                                                                                                                                                                                                                               | This study assessed implications of the Coronavirus Disease 19 (COVID-19) pandemic on household income and food security in two East African countries – Kenya and Uganda, using online survey data from 442 respondents. Results show that more than two-thirds of the respondents experienced income shocks due to the COVID-19 crisis. Food security and dietary quality worsened, as measured by the food insecurity experience scale and the frequency of consumption of nutritionally-rich foods. The proportion of food insecure respondents increased by 38% and 44% in Kenya and Uganda respectively, and in both countries, the regular                                                                                                                                                                                                                                                                                                                                                                                                                                                                                                                                                                       |

|                                                                                                                |                                                                                                           |                |                          |                                                                                                          |                                                                                                                                                                                                                                                                                                                                                                                                                                                                                                                                                                                                                                                                                                                                                                                                                                                                                                                                                                                                                                                                                                                                                                                                                                                                                                                                                                                                                                                                        |
|----------------------------------------------------------------------------------------------------------------|-----------------------------------------------------------------------------------------------------------|----------------|--------------------------|----------------------------------------------------------------------------------------------------------|------------------------------------------------------------------------------------------------------------------------------------------------------------------------------------------------------------------------------------------------------------------------------------------------------------------------------------------------------------------------------------------------------------------------------------------------------------------------------------------------------------------------------------------------------------------------------------------------------------------------------------------------------------------------------------------------------------------------------------------------------------------------------------------------------------------------------------------------------------------------------------------------------------------------------------------------------------------------------------------------------------------------------------------------------------------------------------------------------------------------------------------------------------------------------------------------------------------------------------------------------------------------------------------------------------------------------------------------------------------------------------------------------------------------------------------------------------------------|
| <p>rapid assessment.</p>                                                                                       |                                                                                                           |                |                          |                                                                                                          | <p>consumption of fruits decreased by about 30% during the COVID-19 pandemic, compared to a normal period (before the pandemic). Results from probit regressions show that the income-poor households and those dependent on labour income were more vulnerable to income shock, and had poorer food consumption during the COVID-19 pandemic compared to other respondent categories. As such, they were more likely to employ food-based coping strategies compared to those pursuing alternative livelihoods, who generally relied on savings. Farmers were less likely to experience worsened food security compared to other respondent categories who depended to a great extent on market sources for food. In both countries, participation in national social security schemes was less likely to mitigate respondents' income shock during the COVID-19 period. Conversely, membership in savings and loan groups was correlated with less likelihood of suffering income shocks and reduction in food consumption. The results suggest that ongoing and future government responses should focus on structural changes in social security by developing responsive packages to cushion members pushed into poverty by such pandemics while building strong financial institutions to support the recovery of businesses in the medium term, and ensuring the resilience of food supply chains particularly those making available nutrient-dense foods.</p> |
| <p>Food security and welfare changes under COVID-19 in Sub-Saharan Africa: Impacts and responses in Kenya.</p> | <p>Nechifor, V., Ramos, M. P., Ferrari, E., Laichena, J., Kihiu, E., Omanyo, D., ... &amp; Kiriga, B.</p> | <p>2021-03</p> | <p>World development</p> | <p><a href="https://doi.org/10.1016/j.gfs.2021.100514">https://doi.org/10.1016/j.gfs.2021.100514</a></p> | <p>The COVID-19 pandemic has affected all Sub-Saharan economies through a multitude of impact channels. The study determines the medium-term macroeconomic outcomes of the pandemic on the Kenyan economy and links the results with a detailed food security and nutrition microsimulation module. It thus evaluates the effectiveness of the adopted government measures to reduce the negative outcomes on food security and to enable economic recovery at aggregate, sectoral and household levels. Through income support measures, the food sector and food demand partially recover. However, 1.3% of households still fall below calorie intake thresholds, many of which are in rural areas. Results also indicate that the state of food security in Kenya remains vulnerable to the evolution of the pandemic abroad.</p>                                                                                                                                                                                                                                                                                                                                                                                                                                                                                                                                                                                                                                  |

|                                                                                                 |                                                                                                           |                |                                 |                                                                                                          |                                                                                                                                                                                                                                                                                                                                                                                                                                                                                                                                                                                                                                                                                                                                                                                                                                                                                                                                                                                                                                                                                                                                                                                                                                                                                                                                                             |
|-------------------------------------------------------------------------------------------------|-----------------------------------------------------------------------------------------------------------|----------------|---------------------------------|----------------------------------------------------------------------------------------------------------|-------------------------------------------------------------------------------------------------------------------------------------------------------------------------------------------------------------------------------------------------------------------------------------------------------------------------------------------------------------------------------------------------------------------------------------------------------------------------------------------------------------------------------------------------------------------------------------------------------------------------------------------------------------------------------------------------------------------------------------------------------------------------------------------------------------------------------------------------------------------------------------------------------------------------------------------------------------------------------------------------------------------------------------------------------------------------------------------------------------------------------------------------------------------------------------------------------------------------------------------------------------------------------------------------------------------------------------------------------------|
| <p>Covid-19 lockdowns, income distribution, and food security: An analysis for South Africa</p> | <p>Arndt, C., Davies, R., Gabriel, S., Harris, L., Makrelov, K., Robinson, S., ... &amp; Anderson, L.</p> | <p>2020-09</p> | <p>Global Food Security</p>     | <p><a href="https://doi.org/10.1016/j.gfs.2020.100410">https://doi.org/10.1016/j.gfs.2020.100410</a></p> | <p>Absent vaccines and pharmaceutical interventions, the only tool available to mitigate its demographic effects is some measure of physical distancing, to reduce contagion by breaking social and economic contacts. Policy makers must balance the positive health effects of strong distancing measures, such as lockdowns, against their economic costs, especially the burdens imposed on low income and food insecure households. The distancing measures deployed by South Africa impose large economic costs and have negative implications for the factor distribution of income. Labor with low education levels are much more strongly affected than labor with secondary or tertiary education. As a result, households with low levels of educational attainment and high dependence on labor income would experience an enormous real income shock that would clearly jeopardize the food security of these households. However, in South Africa, total incomes for low income households are significantly insulated by government transfer payments. From public health, income distribution and food security perspectives, the remarkably rapid and severe shocks imposed because of Covid-19 illustrate the value of having in place transfer policies that support vulnerable households in the event of 'black swan' type shocks.</p> |
| <p>COVID-19 pandemic and mitigation strategies: implications for maternal and</p>               | <p>Akseer, N., Kandru, G., Keats, E. C., &amp; Bhutta, Z. A.</p>                                          | <p>2020-08</p> | <p>The America n Journal of</p> | <p><a href="https://doi.org/10.1093/ajcn/nqaa171">https://doi.org/10.1093/ajcn/nqaa171</a></p>           | <p>Coronavirus disease 2019 (COVID-19) continues to ravage health and economic metrics globally, including progress in maternal and child nutrition. Although there has been focus on rising rates of childhood wasting in the short term, maternal and child undernutrition rates are also likely to increase as a consequence of COVID-19 and its impacts on poverty, coverage of essential interventions, and access to appropriate nutritious foods. Key sectors at particular risk of collapse or reduced efficiency in the wake of COVID-19 include food systems, incomes, and social protection, health care services for women and children, and services and access to clean water and sanitation. This review highlights key areas of concern for maternal and child nutrition during and in the aftermath of COVID-19 while providing strategic guidance for countries in their efforts to reduce maternal and child undernutrition. Rooted in learnings from the exemplars in Global Health's Stunting Reduction Exemplars project, we provide a set of recommendations that</p>                                                                                                                                                                                                                                                                |



|                             |  |  |                    |                                                                                                                                                                                                                                                                                                                                                                                                                                                                                                                                                                                                                                                                                                                                                                                                                                                                                                                                                                                                                                                                                                                                                                                    |
|-----------------------------|--|--|--------------------|------------------------------------------------------------------------------------------------------------------------------------------------------------------------------------------------------------------------------------------------------------------------------------------------------------------------------------------------------------------------------------------------------------------------------------------------------------------------------------------------------------------------------------------------------------------------------------------------------------------------------------------------------------------------------------------------------------------------------------------------------------------------------------------------------------------------------------------------------------------------------------------------------------------------------------------------------------------------------------------------------------------------------------------------------------------------------------------------------------------------------------------------------------------------------------|
| child health and nutrition. |  |  | Clinical Nutrition | <p>span investments in sectors that have sustained direct and indirect impact on nutrition. These include interventions to strengthen the food-supply chain and reducing food insecurity to assist those at immediate risk of food shortages. Other strategies could include targeted social safety net programs, payment deferrals, or tax breaks as well as suitable cash-support programs for the most vulnerable. Targeting the most marginalized households in rural populations and urban slums could be achieved through deploying community health workers and supporting women and community members. Community-led sanitation programs could be key to ensuring healthy household environments and reducing undernutrition. Additionally, several COVID-19 response measures such as contact tracing and self-isolation could also be exploited for nutrition protection. Global health and improvements in undernutrition will require governments, donors, and development partners to re-strategize and re-prioritize investments for the COVID-19 era, and will necessitate data-driven decision making, political will and commitment, and international unity.</p> |
|-----------------------------|--|--|--------------------|------------------------------------------------------------------------------------------------------------------------------------------------------------------------------------------------------------------------------------------------------------------------------------------------------------------------------------------------------------------------------------------------------------------------------------------------------------------------------------------------------------------------------------------------------------------------------------------------------------------------------------------------------------------------------------------------------------------------------------------------------------------------------------------------------------------------------------------------------------------------------------------------------------------------------------------------------------------------------------------------------------------------------------------------------------------------------------------------------------------------------------------------------------------------------------|
