# Supplementary material for: The COVID-19 pandemic and child malnutrition in sub-Saharan Africa: A scoping review
Source: bioRxiv or medRxiv preprint supplement (doi:10.1101/2021.07.21.21260929), 2021-07-23
Supplement: Supplementary file [file media-4.pdf]

## Literature Table - Screening and Assessment of Eligibility - Prisma Framework (n=26)

Literature excluded after the assessment of eligibility phase of the Prisma framework, are marked in red and were provided with a note regarding the rationale for exclusion.

| Title                                                                                                      | Authors                                                                                                                  | Date       | Journal            | URL                                                                                                                                                                                                        | Abstract                                                                                                                                                                                                                                                                                                                                                                                                                                                                                                                                                                                                                                                                                                                                                                                                                                                                                                                                                                                                                                                                                                                                                                                                                                                                                                                                                               | Rationale for Exclusion                                                                                                                  |
|------------------------------------------------------------------------------------------------------------|--------------------------------------------------------------------------------------------------------------------------|------------|--------------------|------------------------------------------------------------------------------------------------------------------------------------------------------------------------------------------------------------|------------------------------------------------------------------------------------------------------------------------------------------------------------------------------------------------------------------------------------------------------------------------------------------------------------------------------------------------------------------------------------------------------------------------------------------------------------------------------------------------------------------------------------------------------------------------------------------------------------------------------------------------------------------------------------------------------------------------------------------------------------------------------------------------------------------------------------------------------------------------------------------------------------------------------------------------------------------------------------------------------------------------------------------------------------------------------------------------------------------------------------------------------------------------------------------------------------------------------------------------------------------------------------------------------------------------------------------------------------------------|------------------------------------------------------------------------------------------------------------------------------------------|
| <a href="#">Tackling Childhood Stunting in the Eastern Mediterranean Region in the Context of COVID-19</a> | Jawaldeh, Ayoub Al; Doggui, Radhouene; Borghi, Elaine; Aguenau, Hassan; Ammari, Laila El; Abul-Fadl, Azza; McColl, Karen | 2020-11-19 | Children (Basel)   | <a href="https://www.ncbi.nlm.nih.gov/pubmed/33227997/">https://www.ncbi.nlm.nih.gov/pubmed/33227997/</a><br><a href="https://doi.org/10.3390/children7110239">https://doi.org/10.3390/children7110239</a> | Over 20 million children under 5 years old in the WHO Eastern Mediterranean Region have stunted growth, as a result of chronic malnutrition, with damaging long-term consequences for individuals and societies. This review extracted and analyzed data from the UNICEF, WHO and the World Bank malnutrition estimates to present an overall picture of childhood stunting in the region. The number of children under 5 in the region who are affected by stunting has dropped from 24.5 million (40%) in 1990 to 20.6 million (24.2%) in 2019. The reduction rate since the 2012 baseline is only about two fifths of that required and much more rapid progress will be needed to reach the internationally agreed targets by 2025 and 2030. Prevalence is highest in low-income countries and those with a lower Human Development Index. The COVID-19 pandemic threatens to undermine efforts to reduce stunting, through its impact on access and affordability of safe and nutritious foods and access to important health services. Priority areas for action to tackle stunting as part of a comprehensive, multisectoral nutrition strategy are proposed. In light of the threat that COVID-19 will exacerbate the already heavy burden of malnutrition in the Eastern Mediterranean Region, implementation of such strategies is more important than ever. | The study focuses on the eastern Mediterranean region, not covering Sub-Saharan Africa and therefore not meeting the inclusion criteria. |
| <a href="#">Health systems and nutrition in the time of COVID-19</a>                                       | Khan, Amir Ullah; Bali, Vinita                                                                                           | 2021-03-18 | J. Soc. Econ. Rev. | <a href="https://www.ncbi.nlm.nih.gov/pmc/articles/PMC7971388">https://www.ncbi.nlm.nih.gov/pmc/articles/PMC7971388</a>                                                                                    | As infection rates rise, job losses increase and workers leave cities to walk back home, and there is a silent hunger and nutrition crisis striking the country. Those who will bear the brunt of this are the already vulnerable—namely, children, adolescent girls, nursing and expectant mothers—now denied even basic calories. Among these are some who are also suffering huge weight losses because of the 15 days of high fever. This tragedy will play out in various horrifying ways in the future and must be addressed with urgency. Our stimulus package promises loans, which will take time to reach the poor, and a meager ration of cereals and pulses, while hunger                                                                                                                                                                                                                                                                                                                                                                                                                                                                                                                                                                                                                                                                                  | The paper covers the socioeconomic effects on child malnutrition rates and                                                               |

|                                                                                                    |                                 |            |            |                                                                                                                                                                                                            |                                                                                                                                                                                                                                                                                                                                                                                                                                                                                                                                                                                                                                                                                                                                                                                                                                                                                                                                                                                                                                                                                                                                                                                                                                                                                                                                                                                                                                                                                                                                                                                                                                                                                                                                                                                                                                                                                                                                                                                                                                                                                                                                                                                                                                                                                                                                                       |                                                                                                                                                                                                                             |
|----------------------------------------------------------------------------------------------------|---------------------------------|------------|------------|------------------------------------------------------------------------------------------------------------------------------------------------------------------------------------------------------------|-------------------------------------------------------------------------------------------------------------------------------------------------------------------------------------------------------------------------------------------------------------------------------------------------------------------------------------------------------------------------------------------------------------------------------------------------------------------------------------------------------------------------------------------------------------------------------------------------------------------------------------------------------------------------------------------------------------------------------------------------------------------------------------------------------------------------------------------------------------------------------------------------------------------------------------------------------------------------------------------------------------------------------------------------------------------------------------------------------------------------------------------------------------------------------------------------------------------------------------------------------------------------------------------------------------------------------------------------------------------------------------------------------------------------------------------------------------------------------------------------------------------------------------------------------------------------------------------------------------------------------------------------------------------------------------------------------------------------------------------------------------------------------------------------------------------------------------------------------------------------------------------------------------------------------------------------------------------------------------------------------------------------------------------------------------------------------------------------------------------------------------------------------------------------------------------------------------------------------------------------------------------------------------------------------------------------------------------------------|-----------------------------------------------------------------------------------------------------------------------------------------------------------------------------------------------------------------------------|
|                                                                                                    |                                 |            |            |                                                                                                                                                                                                            | and insufficient nutrition are immediate problems as Raghuram Rajan pointed out recently.                                                                                                                                                                                                                                                                                                                                                                                                                                                                                                                                                                                                                                                                                                                                                                                                                                                                                                                                                                                                                                                                                                                                                                                                                                                                                                                                                                                                                                                                                                                                                                                                                                                                                                                                                                                                                                                                                                                                                                                                                                                                                                                                                                                                                                                             | potential mitigation strategies, however is focused solely on India.                                                                                                                                                        |
| <a href="#">The Burden of Malnutrition and Fatal COVID-19: A Global Burden of Disease Analysis</a> | Mertens, Elly; Peñalvo, José L. | 2021-01-21 | Front Nutr | <a href="https://doi.org/10.3389/fnut.2020.619850">https://doi.org/10.3389/fnut.2020.619850</a><br><a href="https://www.ncbi.nlm.nih.gov/pubmed/33553234">https://www.ncbi.nlm.nih.gov/pubmed/33553234</a> | Background: Although reasonable to assume, it is not yet clear whether malnourished countries are at higher risk for severe or fatal coronavirus disease 2019 (COVID-19). This study aims to identify the countries where prevalent malnutrition may be a driving factor for fatal disease after severe acute respiratory syndrome coronavirus 2 (SARS-CoV-2) infection. Methods: Using estimates from the Global Burden of Disease 2019, country-level burden of malnutrition was quantified using four indicators: death rates for child growth failure (underweight, stunting, and/or wasting) and years lived with disability (YLD) attributed to iron and vitamin A deficiencies and high body mass index (BMI). Global mortality descriptors of the ongoing COVID-19 pandemic were extracted from the European Centre for Disease Prevention and Control, and case fatality ratios (CFRs) were calculated introducing a lag time of 10 weeks after the first death of a confirmed case. Bivariate analyses for 172 countries were carried out for malnutrition indicators and fatal COVID-19. Correlations between burden indicators were characterized by Spearman's rank correlation coefficients ( $\rho$ ) and visually by scatterplots. Restricted cubic splines and underlying negative binomial regressions adjusted for countries' age-structure, prevalent chronic comorbidities related to COVID-19, population density, and income group were used to explore non-linear relationships. Results: Stratified by the World Bank income group, a moderate positive association between YLD rates for iron deficiency and CFRs for COVID-19 was observed for low-income countries ( $\rho = 0.60$ , $p = 0.027$ ), whereas no clear indications for the association with child growth failure, vitamin A deficiency, or high BMI were found ( $\rho < 0.30$ ). Countries ranking high on at least three malnutrition indicators and presenting also an elevated CFR for COVID-19 are sub-Saharan African countries, namely, Angola, Burkina Faso, Chad, Liberia, Mali, Niger, Sudan, and Tanzania, as well as Yemen and Guyana. Conclusions: Population-level malnutrition appears to be related to increased rates of fatal COVID-19 in areas with an elevated burden of undernutrition, such as countries in the Sahel strip. COVID-19 | The paper discusses the effects of malnutrition on covid-19 disease outcome, which is not coherent with the goal of the underlying systematic literature review, aiming to observe the effects of covid-19 on malnutrition. |

|                                                                                                                                                                               |                                                                                                                                                  |            |                    |                                                                                                                                                                                                                                                                                                                                                                                                                                                                                                                                 |                                                                                                                                                                                                                                                                                                                                                                                                                                                                                                                                                                                                                                                                                                                                                                                                                                                                                                                                                                                                                                                                                                                                                                                                                                                                                                                                                                                                                                                                                                                                                                                                                                                                                                                                                                                                                                                                                                                                                                                                                                                                                                                                                                                                                                                                                                                                                                                                                                                                                                                                                                                        |  |
|-------------------------------------------------------------------------------------------------------------------------------------------------------------------------------|--------------------------------------------------------------------------------------------------------------------------------------------------|------------|--------------------|---------------------------------------------------------------------------------------------------------------------------------------------------------------------------------------------------------------------------------------------------------------------------------------------------------------------------------------------------------------------------------------------------------------------------------------------------------------------------------------------------------------------------------|----------------------------------------------------------------------------------------------------------------------------------------------------------------------------------------------------------------------------------------------------------------------------------------------------------------------------------------------------------------------------------------------------------------------------------------------------------------------------------------------------------------------------------------------------------------------------------------------------------------------------------------------------------------------------------------------------------------------------------------------------------------------------------------------------------------------------------------------------------------------------------------------------------------------------------------------------------------------------------------------------------------------------------------------------------------------------------------------------------------------------------------------------------------------------------------------------------------------------------------------------------------------------------------------------------------------------------------------------------------------------------------------------------------------------------------------------------------------------------------------------------------------------------------------------------------------------------------------------------------------------------------------------------------------------------------------------------------------------------------------------------------------------------------------------------------------------------------------------------------------------------------------------------------------------------------------------------------------------------------------------------------------------------------------------------------------------------------------------------------------------------------------------------------------------------------------------------------------------------------------------------------------------------------------------------------------------------------------------------------------------------------------------------------------------------------------------------------------------------------------------------------------------------------------------------------------------------------|--|
|                                                                                                                                                                               |                                                                                                                                                  |            |                    |                                                                                                                                                                                                                                                                                                                                                                                                                                                                                                                                 | response plans in malnourished countries, vulnerable to fatal COVID-19, should incorporate food security, nutrition, and social protection as a priority component in order to reduce COVID-19 fatality.                                                                                                                                                                                                                                                                                                                                                                                                                                                                                                                                                                                                                                                                                                                                                                                                                                                                                                                                                                                                                                                                                                                                                                                                                                                                                                                                                                                                                                                                                                                                                                                                                                                                                                                                                                                                                                                                                                                                                                                                                                                                                                                                                                                                                                                                                                                                                                               |  |
| <a href="#">Early estimates of the indirect effects of the COVID-19 pandemic on maternal and child mortality in low-income and middle-income countries: a modelling study</a> | Roberton, Timothy; Carter, Emily D; Chou, Victoria B; Stegmuller, Angela R; Jackson, Bianca D; Tam, Yvonne; Sawadogo-Lewis, Talata; Walker, Neff | 2020-05-12 | Lancet Glob Health | <a href="https://api.ebscohost.com/ehost/article/pii/S2214109X20302291">https://api.ebscohost.com/ehost/article/pii/S2214109X20302291;</a><br><a href="https://www.sciencedirect.com/science/article/pii/S2214109X20302291">https://www.sciencedirect.com/science/article/pii/S2214109X20302291;</a><br><a href="https://doi.org/10.1016/s2214-109x(20)30229-1">https://doi.org/10.1016/s2214-109x(20)30229-1;</a><br><a href="https://www.ncbi.nlm.nih.gov/pubmed/32405459/">https://www.ncbi.nlm.nih.gov/pubmed/32405459/</a> | <p>BACKGROUND: While the COVID-19 pandemic will increase mortality due to the virus, it is also likely to increase mortality indirectly. In this study, we estimate the additional maternal and under-5 child deaths resulting from the potential disruption of health systems and decreased access to food. METHODS: We modelled three scenarios in which the coverage of essential maternal and child health interventions is reduced by 9·8–51·9% and the prevalence of wasting is increased by 10–50%. Although our scenarios are hypothetical, we sought to reflect real-world possibilities, given emerging reports of the supply-side and demand-side effects of the pandemic. We used the Lives Saved Tool to estimate the additional maternal and under-5 child deaths under each scenario, in 118 low-income and middle-income countries. We estimated additional deaths for a single month and extrapolated for 3 months, 6 months, and 12 months. FINDINGS: Our least severe scenario (coverage reductions of 9·8–18·5% and wasting increase of 10%) over 6 months would result in 253 500 additional child deaths and 12 200 additional maternal deaths. Our most severe scenario (coverage reductions of 39·3–51·9% and wasting increase of 50%) over 6 months would result in 1 157 000 additional child deaths and 56 700 additional maternal deaths. These additional deaths would represent an increase of 9·8–44·7% in under-5 child deaths per month, and an 8·3–38·6% increase in maternal deaths per month, across the 118 countries. Across our three scenarios, the reduced coverage of four childbirth interventions (parenteral administration of uterotonics, antibiotics, and anticonvulsants, and clean birth environments) would account for approximately 60% of additional maternal deaths. The increase in wasting prevalence would account for 18–23% of additional child deaths and reduced coverage of antibiotics for pneumonia and neonatal sepsis and of oral rehydration solution for diarrhoea would together account for around 41% of additional child deaths. INTERPRETATION: Our estimates are based on tentative assumptions and represent a wide range of outcomes. Nonetheless, they show that, if routine health care is disrupted and access to food is decreased (as a result of unavoidable shocks, health system collapse, or intentional choices made in responding to the pandemic), the increase in child and maternal deaths will be devastating. We hope these numbers add context as policy makers establish guidelines</p> |  |

|                                                                                                                             |                                                                                                                                                                   |            |                         |                                                                                                                                                                                                               |                                                                                                                                                                                                                                                                                                                                                                                                                                                                                                                                                                                                                                                                                                                                                                                                                                                                                                                                                                                                                                                                                                                                                                                                                                                                                                                                                                                                                                                                                                                                                                                                                                    |                                                                                                                                  |
|-----------------------------------------------------------------------------------------------------------------------------|-------------------------------------------------------------------------------------------------------------------------------------------------------------------|------------|-------------------------|---------------------------------------------------------------------------------------------------------------------------------------------------------------------------------------------------------------|------------------------------------------------------------------------------------------------------------------------------------------------------------------------------------------------------------------------------------------------------------------------------------------------------------------------------------------------------------------------------------------------------------------------------------------------------------------------------------------------------------------------------------------------------------------------------------------------------------------------------------------------------------------------------------------------------------------------------------------------------------------------------------------------------------------------------------------------------------------------------------------------------------------------------------------------------------------------------------------------------------------------------------------------------------------------------------------------------------------------------------------------------------------------------------------------------------------------------------------------------------------------------------------------------------------------------------------------------------------------------------------------------------------------------------------------------------------------------------------------------------------------------------------------------------------------------------------------------------------------------------|----------------------------------------------------------------------------------------------------------------------------------|
|                                                                                                                             |                                                                                                                                                                   |            |                         |                                                                                                                                                                                                               | and allocate resources in the days and months to come. FUNDING: Bill & Melinda Gates Foundation, Global Affairs Canada.                                                                                                                                                                                                                                                                                                                                                                                                                                                                                                                                                                                                                                                                                                                                                                                                                                                                                                                                                                                                                                                                                                                                                                                                                                                                                                                                                                                                                                                                                                            |                                                                                                                                  |
| <a href="#">Possible Impact of COVID-19 on Children in Africa: Reflections from Italy and Burkina Faso</a>                  | Ouedraogo, Paul; Schumacher, Richard Fabian                                                                                                                       | 2020-08-07 | J Trop Pediatr          | <a href="https://www.ncbi.nlm.nih.gov/pubmed/32766698/">https://www.ncbi.nlm.nih.gov/pubmed/32766698/</a> ; <a href="https://doi.org/10.1093/trop/cj/fmaa055">https://doi.org/10.1093/trop/cj/fmaa055</a>     | Africa is the World Health Organization-region least affected by the Severe Acute Respiratory Syndrome Coronavirus 2 (SARS-CoV-2) pandemic. Here, we compare the situation in severely hit Italy with that in less hit Burkina Faso, focussing on the differences in epidemiological, geographical, demographical, cultural and medical conditions to highlight how a full-blown war on the pandemic can impact on other, equally important aspects of global child health.                                                                                                                                                                                                                                                                                                                                                                                                                                                                                                                                                                                                                                                                                                                                                                                                                                                                                                                                                                                                                                                                                                                                                        | Does not specifically focus on malnutrition – addresses indirect effects in general, without specically addressing malnutrition. |
| <a href="#">Food availability, accessibility and dietary practices during the COVID-19 pandemic: a multi-country survey</a> | Jafri, Ali; Mathe, Nonsikelelo; Aglago, Elom K; Konyole, Silvenus O; Ouedraogo, Moussa; Audain, Keiron; Zongo, Urbain; Laar, Amos K; Johnson, Jeffrey; Sanou, Dia | 2021-03-05 | Public health nutrition | <a href="https://www.ncbi.nlm.nih.gov/pubmed/33663623/">https://www.ncbi.nlm.nih.gov/pubmed/33663623/</a> ; <a href="https://doi.org/10.1017/s1368980021000987">https://doi.org/10.1017/s1368980021000987</a> | OBJECTIVE: To investigate the perceived effects of the coronavirus disease (COVID-19) pandemic lockdown measures on food availability, accessibility, dietary practices and strategies used by participants to cope with these measures. DESIGN: We conducted a cross-sectional multi-country online survey between May and July 2020. We used a study-specific questionnaire mainly based on the adaptation of questions to assess food security and coping strategies from the World Food Programme's 'Emergency Food Security Assessment' and 'The Coping Strategy Index'. SETTING: The questionnaire was hosted online using Google Forms and shared using social media platforms. PARTICIPANTS: A total of 1075 adult participants from eighty-two countries completed the questionnaire. RESULTS: As a prelude to COVID-19 lockdowns, 62.7 % of the participants reported to have stockpiled food, mainly cereals (59.5 % of the respondents) and legumes (48.8 %). An increase in the prices of staples, such as cereals and legumes, was widely reported. Price increases have been identified as an obstacle to food acquisition by 32.7 % of participants. Participants reported having lesser variety (50.4 %), quality (30.2 %) and quantity (39.2 %) of foods, with disparities across regions. Vulnerable groups were reported to be facing some struggle to acquire adequate food, especially people with chronic diseases (20.2 %), the elderly (17.3 %) and children (14.5 %). To cope with the situation, participants mostly relied on less preferred foods (49 %), reduced portion sizes (30 %) and/or reduced |                                                                                                                                  |

|                                                                                                                                      |                                                                                                            |            |                       |                                                                                                                                                                                                            |                                                                                                                                                                                                                                                                                                                                                                                                                                                                                                                                                                                                                                                                                                                                                                                                                                                                                                                                                                                                                                                                                                                                                                                                                                                                                                                                                                                                                                                                                                                                                                                                                                                                                                                                                                                                                                     |                                                                                                   |
|--------------------------------------------------------------------------------------------------------------------------------------|------------------------------------------------------------------------------------------------------------|------------|-----------------------|------------------------------------------------------------------------------------------------------------------------------------------------------------------------------------------------------------|-------------------------------------------------------------------------------------------------------------------------------------------------------------------------------------------------------------------------------------------------------------------------------------------------------------------------------------------------------------------------------------------------------------------------------------------------------------------------------------------------------------------------------------------------------------------------------------------------------------------------------------------------------------------------------------------------------------------------------------------------------------------------------------------------------------------------------------------------------------------------------------------------------------------------------------------------------------------------------------------------------------------------------------------------------------------------------------------------------------------------------------------------------------------------------------------------------------------------------------------------------------------------------------------------------------------------------------------------------------------------------------------------------------------------------------------------------------------------------------------------------------------------------------------------------------------------------------------------------------------------------------------------------------------------------------------------------------------------------------------------------------------------------------------------------------------------------------|---------------------------------------------------------------------------------------------------|
|                                                                                                                                      |                                                                                                            |            |                       |                                                                                                                                                                                                            | the number of meals (25.7 %). CONCLUSIONS: The COVID-19 pandemic negatively impacted food accessibility and availability, altered dietary practices and worsened the food insecurity situation, particularly in the most fragile regions.                                                                                                                                                                                                                                                                                                                                                                                                                                                                                                                                                                                                                                                                                                                                                                                                                                                                                                                                                                                                                                                                                                                                                                                                                                                                                                                                                                                                                                                                                                                                                                                           |                                                                                                   |
| <a href="#">Predicting the Impact of COVID-19 and the Potential Impact of the Public Health Response on Disease Burden in Uganda</a> | Bell, David; Hansen, Kristian Schultz; Kiragga, Agnes N.; Kambuğu, Andrew; Kissa, John; Mbonye, Anthony K. | 2020-07-23 | Am J Trop Med Hyg     | <a href="https://www.ncbi.nlm.nih.gov/pubmed/32765975/">https://www.ncbi.nlm.nih.gov/pubmed/32765975/</a><br><a href="https://doi.org/10.4269/ajtmh.20-0546">https://doi.org/10.4269/ajtmh.20-0546</a>     | The COVID-19 pandemic and public health “lockdown” responses in sub-Saharan Africa, including Uganda, are now widely reported. Although the impact of COVID-19 on African populations has been relatively light, it is feared that redirecting focus and prioritization of health systems to fight COVID-19 may have an impact on access to non-COVID-19 diseases. We applied age-based COVID-19 mortality data from China to the population structures of Uganda and non-African countries with previously established outbreaks, comparing theoretical mortality and disability-adjusted life years (DALYs) lost. We then predicted the impact of possible scenarios of the COVID-19 public health response on morbidity and mortality for HIV/AIDS, malaria, and maternal health in Uganda. Based on population age structure alone, Uganda is predicted to have a relatively low COVID-19 burden compared with an equivalent transmission in comparison countries, with 12% of the mortality and 19% of the lost DALYs predicted for an equivalent transmission in Italy. By contrast, scenarios of the impact of the public health response on malaria and HIV/AIDS predict additional disease burdens outweighing that predicted from extensive SARS-CoV-2 transmission. Emerging disease data from Uganda suggest that such deterioration may already be occurring. The results predict a relatively low COVID-19 impact on Uganda associated with its young population, with a high risk of negative impact on non-COVID-19 disease burden from a prolonged lockdown response. This may reverse hard-won gains in addressing fundamental vulnerabilities in women and children’s health, and underlines the importance of tailoring COVID-19 responses according to population structure and local disease vulnerabilities. | Notion of potential Impact of Covid-19 did not include the factor of malnutrition/food insecurity |
| <a href="#">The Changing Aspects of Motherhood in Face of the COVID-19 Pandemic in Low-</a>                                          | Kingsley, Jennifer Prince; Vijay, Paul Kingsley; Kumaresan, Jacob;                                         | 2020-11-26 | Matern Child Health J | <a href="https://doi.org/10.1007/s10995-020-03044-9">https://doi.org/10.1007/s10995-020-03044-9</a><br><a href="https://www.ncbi.nlm.nih.gov/pubmed/330449">https://www.ncbi.nlm.nih.gov/pubmed/330449</a> | PURPOSE: To advocate perspectives to strengthen existing healthcare systems to prioritize maternal health services amidst and beyond the COVID-19 pandemic in low- and middle income countries. DESCRIPTION: COVID-19 directly affects pregnant women causing more severe disease and adverse pregnancy outcomes. The indirect effects due to the monumental COVID-19 response are much worse, increasing maternal and neonatal mortality. ASSESSMENT: Amidst COVID-19, governments must balance effective COVID-19 response measures while                                                                                                                                                                                                                                                                                                                                                                                                                                                                                                                                                                                                                                                                                                                                                                                                                                                                                                                                                                                                                                                                                                                                                                                                                                                                                         | Maternal Health is discussed primarily, without focusing on                                       |

|                                                                                                                                                                     |                                                                                                                   |                   |                            |                                                                                                                                                                                                                       |                                                                                                                                                                                                                                                                                                                                                                                                                                                                                                                                                                                                                                                                                                                                                                                                                                                                                                                                                                                                                                                                                                                                                                                                                                                                                                                                                                                                                                                                               |                                                               |
|---------------------------------------------------------------------------------------------------------------------------------------------------------------------|-------------------------------------------------------------------------------------------------------------------|-------------------|----------------------------|-----------------------------------------------------------------------------------------------------------------------------------------------------------------------------------------------------------------------|-------------------------------------------------------------------------------------------------------------------------------------------------------------------------------------------------------------------------------------------------------------------------------------------------------------------------------------------------------------------------------------------------------------------------------------------------------------------------------------------------------------------------------------------------------------------------------------------------------------------------------------------------------------------------------------------------------------------------------------------------------------------------------------------------------------------------------------------------------------------------------------------------------------------------------------------------------------------------------------------------------------------------------------------------------------------------------------------------------------------------------------------------------------------------------------------------------------------------------------------------------------------------------------------------------------------------------------------------------------------------------------------------------------------------------------------------------------------------------|---------------------------------------------------------------|
| <p>and Middle-<br/>Income Countries</p>                                                                                                                             | <p>Sathiakumar,<br/>Nalini</p>                                                                                    |                   |                            | <p><a href="https://pubmed.ncbi.nlm.nih.gov/33244678/">gov/pubmed/33244678/</a></p>                                                                                                                                   | <p>continuing delivery of essential health services. Using the World Health Organization's operational guidelines as a base, countries must conduct contextualized analyses to tailor their operations. Evidence based information on different services and comparative cost-benefits will help decisions on trade-offs. Situational analyses identifying extent and reasons for service disruptions and estimates of impacts using modelling techniques will guide prioritization of services. Ensuring adequate supplies, maintaining core interventions, expanding non-physician workforce and deploying telehealth are some adaptive measures to optimize care. Beyond the COVID-19 pandemic, governments must reinvest in maternal and child health by building more resilient maternal health services supported by political commitment and multisectoral engagement, and with assistance from international partners. CONCLUSIONS: Multi-sectoral investments providing high-quality care that ensures continuity and available to all segments of the population are needed. A robust primary healthcare system linked to specialist care and accessible to all segments of the population including marginalized subgroups is of paramount importance. Systematic approaches to digital health care solutions to bridge gaps in service is imperative. Future pandemic preparedness programs must include action plans for resilient maternal health services.</p> | <p>child<br/>malnutrition in<br/>relation to<br/>covid-19</p> |
| <p><a href="#">Beyond the Disease: Contextualized Implications of the COVID-19 Pandemic for Children and Young People Living in Eastern and Southern Africa</a></p> | <p>Govender, Kaymarlin; Cowden, Richard Gregory; Nyamaruze, Patrick; Armstrong, Russell Murray; Hatane, Luann</p> | <p>2020-10-19</p> | <p>Front Public Health</p> | <p><a href="https://doi.org/10.3389/fpubh.2020.00504">https://doi.org/10.3389/fpubh.2020.00504</a>;<br/><a href="https://www.ncbi.nlm.nih.gov/pubmed/33194933/">https://www.ncbi.nlm.nih.gov/pubmed/33194933/</a></p> | <p>The coronavirus disease 2019 (COVID-19) pandemic has created extraordinary challenges and prompted remarkable social changes around the world. The effects of COVID-19 and the public health control measures that have been implemented to mitigate its impact are likely to be accompanied by a unique set of consequences for specific subpopulations living in low-income countries that have fragile health systems and pervasive social-structural vulnerabilities. This paper discusses the implications of COVID-19 and related public health interventions for children and young people living in Eastern and Southern Africa. Actionable prevention, care, and health promotion initiatives are proposed to attenuate the negative effects of the pandemic and government-enforced movement restrictions on children and young people.</p>                                                                                                                                                                                                                                                                                                                                                                                                                                                                                                                                                                                                                      |                                                               |
| <p><a href="#">Falling living standards during the COVID-19</a></p>                                                                                                 | <p>Egger, Dennis; Miguel, Edward; Warren, Shana</p>                                                               | <p>2021-02-05</p> | <p>Sci Adv</p>             | <p><a href="https://doi.org/10.1126/sciadv.abe0997">https://doi.org/10.1126/sciadv.abe0997</a>;</p>                                                                                                                   | <p>Despite numerous journalistic accounts, systematic quantitative evidence on economic conditions during the ongoing COVID-19 pandemic remains scarce for most low- and middle-income countries, partly due to limitations</p>                                                                                                                                                                                                                                                                                                                                                                                                                                                                                                                                                                                                                                                                                                                                                                                                                                                                                                                                                                                                                                                                                                                                                                                                                                               |                                                               |

|                                                                                     |                                                                                                                                                                                                                                                                                                                                                                                                                              |  |  |                                                                                                                  |                                                                                                                                                                                                                                                                                                                                                                                                                                                                                                                                                                                                                                                                                                                                                                                                                                                                                                                   |  |
|-------------------------------------------------------------------------------------|------------------------------------------------------------------------------------------------------------------------------------------------------------------------------------------------------------------------------------------------------------------------------------------------------------------------------------------------------------------------------------------------------------------------------|--|--|------------------------------------------------------------------------------------------------------------------|-------------------------------------------------------------------------------------------------------------------------------------------------------------------------------------------------------------------------------------------------------------------------------------------------------------------------------------------------------------------------------------------------------------------------------------------------------------------------------------------------------------------------------------------------------------------------------------------------------------------------------------------------------------------------------------------------------------------------------------------------------------------------------------------------------------------------------------------------------------------------------------------------------------------|--|
| <p><a href="#">crisis: Quantitative evidence from nine developing countries</a></p> | <p>S.; Shenoy, Ashish; Collins, Elliott; Karlan, Dean; Parkerson, Doug; Mobarak, A. Mushfiq; Fink, Günther; Udry, Christopher; Walker, Michael; Haushofer, Johannes; Larrebourg, Magdalena; Athey, Susan; Lopez-Pena, Paula; Benhachmi, Salim; Humphreys, Macartan; Lowe, Layna; Meriggi, Niccoló F.; Wabwire, Andrew; Davis, C. Austin; Pape, Utz Johann; Graff, Tilman; Voors, Maarten; Nekesa, Carolyn; Vernot, Corey</p> |  |  | <p><a href="https://www.ncbi.nlm.nih.gov/pubmed/33547077/">https://www.ncbi.nlm.nih.gov/pubmed/33547077/</a></p> | <p>of official economic statistics in environments with large informal sectors and subsistence agriculture. We assemble evidence from over 30,000 respondents in 16 original household surveys from nine countries in Africa (Burkina Faso, Ghana, Kenya, Rwanda, Sierra Leone), Asia (Bangladesh, Nepal, Philippines), and Latin America (Colombia). We document declines in employment and income in all settings beginning March 2020. The share of households experiencing an income drop ranges from 8 to 87% (median, 68%). Household coping strategies and government assistance were insufficient to sustain precrisis living standards, resulting in widespread food insecurity and dire economic conditions even 3 months into the crisis. We discuss promising policy responses and speculate about the risk of persistent adverse effects, especially among children and other vulnerable groups.</p> |  |
|-------------------------------------------------------------------------------------|------------------------------------------------------------------------------------------------------------------------------------------------------------------------------------------------------------------------------------------------------------------------------------------------------------------------------------------------------------------------------------------------------------------------------|--|--|------------------------------------------------------------------------------------------------------------------|-------------------------------------------------------------------------------------------------------------------------------------------------------------------------------------------------------------------------------------------------------------------------------------------------------------------------------------------------------------------------------------------------------------------------------------------------------------------------------------------------------------------------------------------------------------------------------------------------------------------------------------------------------------------------------------------------------------------------------------------------------------------------------------------------------------------------------------------------------------------------------------------------------------------|--|



|                                                                                                                           |                                                                                                                                       |                   |                          |                                                                                                                                                                                                                                                                                                                                                                                                                                                                                                                                                     |                                                                                                                                                                                                                                                                                                                                                                                                                                                                                                                                                                                                                                                                                                                                                                                                                                                                                                                                                                                                                                                                                                                                                                                                                                                                                                                                                                                                                                                                                                                                                                                                                                                                                                                                                                                                |                                                                                                                                                                                                      |
|---------------------------------------------------------------------------------------------------------------------------|---------------------------------------------------------------------------------------------------------------------------------------|-------------------|--------------------------|-----------------------------------------------------------------------------------------------------------------------------------------------------------------------------------------------------------------------------------------------------------------------------------------------------------------------------------------------------------------------------------------------------------------------------------------------------------------------------------------------------------------------------------------------------|------------------------------------------------------------------------------------------------------------------------------------------------------------------------------------------------------------------------------------------------------------------------------------------------------------------------------------------------------------------------------------------------------------------------------------------------------------------------------------------------------------------------------------------------------------------------------------------------------------------------------------------------------------------------------------------------------------------------------------------------------------------------------------------------------------------------------------------------------------------------------------------------------------------------------------------------------------------------------------------------------------------------------------------------------------------------------------------------------------------------------------------------------------------------------------------------------------------------------------------------------------------------------------------------------------------------------------------------------------------------------------------------------------------------------------------------------------------------------------------------------------------------------------------------------------------------------------------------------------------------------------------------------------------------------------------------------------------------------------------------------------------------------------------------|------------------------------------------------------------------------------------------------------------------------------------------------------------------------------------------------------|
| <p><a href="#">The potential impact of the COVID-19 pandemic on child growth and development: a systematic review</a></p> | <p>Araújo, Liubiana Arantes de; Veloso, Cássio Frederico; Souza, Matheus de Campos; Azevedo, João Marcos Coelho de; Tarro, Giulio</p> | <p>2020-09-23</p> | <p>J Pediatr (Rio J)</p> | <p><a href="https://www.sciencedirect.com/science/article/pii/S0221755720302096?via=ih">https://www.sciencedirect.com/science/article/pii/S0221755720302096?via=ih</a><br/> <a href="https://www.ncbi.nlm.nih.gov/pubmed/32980318/">https://www.ncbi.nlm.nih.gov/pubmed/32980318/</a><br/> <a href="https://doi.org/10.1016/j.jped.2020.08.008">https://doi.org/10.1016/j.jped.2020.08.008</a><br/> <a href="https://api.elsevier.com/content/article/pii/S0021755720302096">https://api.elsevier.com/content/article/pii/S0021755720302096</a></p> | <p>OBJECTIVE: This was a systematic review of studies that examined the impact of epidemics or social restriction on mental and developmental health in parents and children/adolescents. SOURCE OF DATA: The PubMed, WHO COVID-19, and SciELO databases were searched on March 15, 2020, and on April 25, 2020, filtering for children (0–18 years) and humans. SYNTHESIS OF DATA: The tools used to mitigate the threat of a pandemic such as COVID-19 may very well threaten child growth and development. These tools — such as social restrictions, shutdowns, and school closures — contribute to stress in parents and children and can become risk factors that threaten child growth and development and may compromise the Sustainable Development Goals. The studies reviewed suggest that epidemics can lead to high levels of stress in parents and children, which begin with concerns about children becoming infected. These studies describe several potential mental and emotional consequences of epidemics such as COVID-19, H1N1, AIDS, and Ebola: severe anxiety or depression among parents and acute stress disorder, post-traumatic stress, anxiety disorders, and depression among children. These data can be related to adverse childhood experiences and elevated risk of toxic stress. The more adverse experiences, the greater the risk of developmental delays and health problems in adulthood, such as cognitive impairment, substance abuse, depression, and non-communicable diseases. CONCLUSION: Information about the impact of epidemics on parents and children is relevant to policy makers to aid them in developing strategies to help families cope with epidemic/pandemic-driven adversity and ensure their children’s healthy development.</p> | <p>The paper focused on the mental health aspect, whereby it is only occasionally indicated and linked to malnutrition where however the examined subject also then is the Mental health aspect.</p> |
| <p><a href="#">Multisystem Resilience for Children and Youth in Disaster: Reflections in the Context of COVID-19</a></p>  | <p>Masten, Ann S.; Motti-Stefanidi, Frosso</p>                                                                                        | <p>2020-06-25</p> | <p>Advers Resil Sci</p>  | <p><a href="https://www.ncbi.nlm.nih.gov/pubmed/32838305/">https://www.ncbi.nlm.nih.gov/pubmed/32838305/</a><br/> <a href="https://doi.org/10.1007/s42844-020-00010-w">https://doi.org/10.1007/s42844-020-00010-w</a></p>                                                                                                                                                                                                                                                                                                                           | <p>In the context of rising disasters worldwide and the challenges of the COVID-19 pandemic, this commentary considers the implications of findings in resilience science on children and youth for disaster preparation and response. The multisystem challenges posed by disasters are illustrated by the COVID-19 pandemic. We discuss the significance of disasters in the history of resilience science and the emergence of a unifying systems definition of resilience. Principles of a multisystem perspective on resilience and major findings on what matters for young people in disasters are delineated with reference to the pandemic. Striking parallels are noted in the psychosocial resilience factors identified at the level of individual children, families, schools, and communities. These parallels suggest that adaptive capacities associated with resilience in these interacting systems reflect interconnected networks and processes that co-evolved and may</p>                                                                                                                                                                                                                                                                                                                                                                                                                                                                                                                                                                                                                                                                                                                                                                                                | <p>Firstly, not specifically focusing on child malnutrition in the context of covid-19, but rather on more general multisystem challenges</p>                                                        |



|                                                                               |                                                                                          |            |                  |                                                                                                                                                 |                                                                                                                                                                                                                                                                                                                                                                                                                                                                                                                                                                                                                                                                                                                                                                                                                                                                                |                                                                                                                                                |
|-------------------------------------------------------------------------------|------------------------------------------------------------------------------------------|------------|------------------|-------------------------------------------------------------------------------------------------------------------------------------------------|--------------------------------------------------------------------------------------------------------------------------------------------------------------------------------------------------------------------------------------------------------------------------------------------------------------------------------------------------------------------------------------------------------------------------------------------------------------------------------------------------------------------------------------------------------------------------------------------------------------------------------------------------------------------------------------------------------------------------------------------------------------------------------------------------------------------------------------------------------------------------------|------------------------------------------------------------------------------------------------------------------------------------------------|
|                                                                               |                                                                                          |            |                  |                                                                                                                                                 | operate in concert. As resilience science moves toward integrated theory, knowledge, and applications in practice, particularly in disaster risk reduction and resilience promotion, more focus will be needed on multisystem and multidisciplinary research, communication, training, and planning.                                                                                                                                                                                                                                                                                                                                                                                                                                                                                                                                                                           | posed by disasters. Secondly, taking a broader perspective of such disasters in an historic context and not focusing specifically on Covid-19. |
| Child malnutrition and COVID-19: the time to act is now                       | Fore, H. H., Dongyu, Q., Beasley, D. M., & Ghebreyesus, T. A.                            | 2020-08-22 | The Lancet       | <a href="https://www.thelancet.com/article/S0140-6736(20)31648-2/fulltext">https://www.thelancet.com/article/S0140-6736(20)31648-2/fulltext</a> | The COVID-19 pandemic is undermining nutrition across the world, particularly in low-income and middle-income countries (LMICs). <sup>1</sup> The worst consequences are borne by young children. Some of the strategies to respond to COVID-19—including physical distancing, school closures, trade restrictions, and country lockdowns—are impacting food systems by disrupting the production, transportation, and sale of nutritious, fresh, and affordable foods, forcing millions of families to rely on nutrient-poor alternatives. Strained health systems and interruptions in humanitarian response are eroding access to essential and often life-saving nutrition services. <sup>2</sup> Social protection systems in many LMICs are overloaded as vulnerable families struggle to access the food and services they need in the context of an economic downturn. |                                                                                                                                                |
| Impacts of COVID-19 on childhood malnutrition and nutrition-related mortality | Headey, D., Heidkamp, R., Osendarp, S., Ruel, M., Scott, N., Black, R., ... & Walker, N. | 2020-07-27 | The Lancet       | <a href="https://doi.org/10.1016/S0140-6736(20)31647-0">https://doi.org/10.1016/S0140-6736(20)31647-0</a>                                       | The unprecedented global social and economic crisis triggered by the COVID-19 pandemic poses grave risks to the nutritional status and survival of young children in low-income and middle-income countries (LMICs). Of particular concern is an expected increase in child malnutrition, including wasting, due to steep declines in household incomes, changes in the availability and affordability of nutritious foods, and interruptions to health, nutrition, and social protection services. <sup>1</sup>                                                                                                                                                                                                                                                                                                                                                               |                                                                                                                                                |
| Is the effect of COVID-19 on children                                         | Simba, J., Sinha, I., Mburugu, P., Agweyu, A.,                                           | 2020-06-18 | Acta Paediatrica | <a href="https://doi.org/10.1111/apa.15419">https://doi.org/10.1111/apa.15419</a>                                                               | The COVID-19 pandemic has had a huge impact on health and society, worldwide. While most high-income countries are felt to be reaching their COVID-19 peak, most low- and middle-income countries (LMICs), particularly sub-Saharan countries, are anticipating an exponential growth                                                                                                                                                                                                                                                                                                                                                                                                                                                                                                                                                                                          | Does not specifically focus on                                                                                                                 |

|                                                                                                                  |                                                                                                                           |                   |                                    |                                                                                                                            |                                                                                                                                                                                                                                                                                                                                                                                                                                                                                                                                                                                                                                                                                                                                                                                                                                                                                                                                                                                                                                                                                                                                                                                                                                                                                                                                                                                                                                                                                                                                                                                            |                                                                                                            |
|------------------------------------------------------------------------------------------------------------------|---------------------------------------------------------------------------------------------------------------------------|-------------------|------------------------------------|----------------------------------------------------------------------------------------------------------------------------|--------------------------------------------------------------------------------------------------------------------------------------------------------------------------------------------------------------------------------------------------------------------------------------------------------------------------------------------------------------------------------------------------------------------------------------------------------------------------------------------------------------------------------------------------------------------------------------------------------------------------------------------------------------------------------------------------------------------------------------------------------------------------------------------------------------------------------------------------------------------------------------------------------------------------------------------------------------------------------------------------------------------------------------------------------------------------------------------------------------------------------------------------------------------------------------------------------------------------------------------------------------------------------------------------------------------------------------------------------------------------------------------------------------------------------------------------------------------------------------------------------------------------------------------------------------------------------------------|------------------------------------------------------------------------------------------------------------|
| <p>underestimated in low-and middle-income countries?</p>                                                        | <p>Emadau, C., Akech, S., ... &amp; English, M.</p>                                                                       |                   |                                    |                                                                                                                            | <p>of cases.1 Overall it has been documented that children are less affected.2 However, in this commentary we describe how in Kenya, a LMIC in sub-Saharan Africa, COVID-19 is likely to have far-reaching direct and indirect implications on children. Of all confirmed cases of COVID-19, only around 1%-5% are children.2 In Kenya, the first case of COVID-19 was diagnosed on 13th March 2020; one month later, six children aged between one and 15 years (2.7% out of 216 total cases) have been diagnosed with the infection according to the Ministry of Health Kenya, COVID-19 Daily Situation Report as at 13th April 2020. Although most have had mild illness, there has been one reported death of a child with underlying comorbidity. As testing for COVID-19 in children is very limited, and children being excluded from mass testing, it is difficult to be confident in the numbers. Collecting nasopharyngeal or oropharyngeal swabs requires the patient to be cooperative, which is difficult to achieve in young children, as well as acute respiratory infections (ARIs), are so common in children that index of suspicion of COVID-19 is low, these pose unique challenges in children. It is therefore imperative that other methods of estimating the burden of COVID-19 in LMICs may have to be utilised including syndromic surveillance as well as modelling data. However, modelling in COVID-19 has led to different predictions depending on assumptions made.3 It is therefore difficult to tell which path the pandemic will follow in reality.</p> | <p>malnutrition – addresses indirect effects in general, without specifically addressing malnutrition.</p> |
| <p>Things must not fall apart: the ripple effects of the COVID-19 pandemic on children in sub-Saharan Africa</p> | <p>Modupe Coker, Morenike O. Folayan, Ian C. Michelow, Regina E. Oladokun, Nguavese Torbunde &amp; Nadia A. Sam-Agudu</p> | <p>2020-09-24</p> | <p>Nature - Pediatric Research</p> | <p><a href="https://www.nature.com/articles/s41390-020-01174-y">https://www.nature.com/articles/s41390-020-01174-y</a></p> | <p>Zero to 19 year-old children in sub-Saharan Africa bear a disproportionate proportion of the global burden of communicable and non-communicable diseases. Significant public health gains have been made in the fight against these diseases, however, factors such as under-equipped health systems, disease outbreaks, conflict, and political instability continue to challenge prevention and control. The novel coronavirus disease (COVID-19) pandemic caused by severe acute respiratory syndrome coronavirus 2 (SARS-CoV-2) introduces new challenges to public health programs in sub-Saharan Africa. Of particular concern are programs targeting major conditions among children, such as undernutrition, vaccine-preventable pneumonia and diarrhea, malaria, tuberculosis, HIV, and sickle cell disease. This article focuses on the impact of the COVID-19 pandemic on child health in sub-Saharan Africa. We review the epidemiology of major pediatric diseases and, referencing modeling projections, discuss the short- and long-term impact of the pandemic on major disease control. We deliberate on potential complications of SARS-CoV-2 co-infections/co-</p>                                                                                                                                                                                                                                                                                                                                                                                                   |                                                                                                            |

|                                                                               |                                                         |                   |                             |                                                                                                            |                                                                                                                                                                                                                                                                                                                                                                                                                                                                                                                                                                                                                                                                                                                                                                                                                                                                                                                                                                                                                                                                                                                                                                                                                                                                                                                                                                                                                                                                                                                                                                                                                                                                                                                                                                                                                                                                                                                                                                                                                                                                                    |  |
|-------------------------------------------------------------------------------|---------------------------------------------------------|-------------------|-----------------------------|------------------------------------------------------------------------------------------------------------|------------------------------------------------------------------------------------------------------------------------------------------------------------------------------------------------------------------------------------------------------------------------------------------------------------------------------------------------------------------------------------------------------------------------------------------------------------------------------------------------------------------------------------------------------------------------------------------------------------------------------------------------------------------------------------------------------------------------------------------------------------------------------------------------------------------------------------------------------------------------------------------------------------------------------------------------------------------------------------------------------------------------------------------------------------------------------------------------------------------------------------------------------------------------------------------------------------------------------------------------------------------------------------------------------------------------------------------------------------------------------------------------------------------------------------------------------------------------------------------------------------------------------------------------------------------------------------------------------------------------------------------------------------------------------------------------------------------------------------------------------------------------------------------------------------------------------------------------------------------------------------------------------------------------------------------------------------------------------------------------------------------------------------------------------------------------------------|--|
|                                                                               |                                                         |                   |                             |                                                                                                            | <p>morbidities and identify critical social and ethical issues. Furthermore, we highlight the paucity of COVID-19 data and clinical trials in this region and the lack of child participants in ongoing studies. Lastly, approaches and interventions to mitigate the pandemic's impact on child health outcomes are discussed.</p>                                                                                                                                                                                                                                                                                                                                                                                                                                                                                                                                                                                                                                                                                                                                                                                                                                                                                                                                                                                                                                                                                                                                                                                                                                                                                                                                                                                                                                                                                                                                                                                                                                                                                                                                                |  |
| <p>Challenges of COVID-19 in children in low- and middle-income countries</p> | <p>Zar HJ, Dawa J, Fischer GB, Castro-Rodriguez JA.</p> | <p>2020-06-25</p> | <p>Paediatr Respir Rev.</p> | <p><a href="https://doi.org/10.1016/j.prrv.2020.06.016">https://doi.org/10.1016/j.prrv.2020.06.016</a></p> | <p>As the coronavirus pandemic extends to low and middle income countries (LMICs), there are growing concerns about the risk of coronavirus disease (COVID-19) in populations with high prevalence of comorbidities, the impact on health and economies more broadly and the capacity of existing health systems to manage the additional burden of COVID-19. The direct effects of COVID are less of a concern in children, who seem to be largely asymptomatic or to develop mild illness as occurs in high income countries; however children in LMICs constitute a high proportion of the population and may have a high prevalence of risk factors for severe lower respiratory infection such as HIV or malnutrition. Further diversion of resources from child health to address the pandemic among adults may further impact on care for children. Poor living conditions in LMICs including lack of sanitation, running water and overcrowding may facilitate transmission of SARS-CoV-2. The indirect effects of the pandemic on child health are of considerable concern, including increasing poverty levels, disrupted schooling, lack of access to school feeding schemes, reduced access to health facilities and interruptions in vaccination and other child health programs. Further challenges in LMICs include the inability to implement effective public health measures such as social distancing, hand hygiene, timely identification of infected people with self-isolation and universal use of masks. Lack of adequate personal protective equipment, especially N95 masks is a key concern for health care worker protection. While continued schooling is crucial for children in LMICs, provision of safe environments is especially challenging in overcrowded resource constrained schools. The current crisis is a harsh reminder of the global inequity in health in LMICs. The pandemic highlights key challenges to the provision of health in LMICs, but also provides opportunities to strengthen child health broadly in such settings.</p> |  |
| <p>A Crisis within a Crisis: COVID-19 and Hunger in African Children</p>      | <p>Aborode AT, Ogunsola SO, Adeyemo AO. A</p>           | <p>2020-11-06</p> | <p>Am J Trop Med Hyg.</p>   | <p><a href="https://doi.org/10.4269/ajtmh.20-1213">https://doi.org/10.4269/ajtmh.20-1213</a></p>           | <p>The WHO recently expressed concern at the potential impact of COVID-19 on hunger, which is likely to exacerbate the already considerable burden of malnutrition of Africa. The impact of the disease is expected to be greater among those grappling with malnutrition, whereas widespread hunger and malnutrition will likely increase because of movement</p>                                                                                                                                                                                                                                                                                                                                                                                                                                                                                                                                                                                                                                                                                                                                                                                                                                                                                                                                                                                                                                                                                                                                                                                                                                                                                                                                                                                                                                                                                                                                                                                                                                                                                                                 |  |

|                                                                                                   |                    |            |                     |                                                                                                   |                                                                                                                                                                                                                                                                                                                                                                                                                                                                                                                                                                                                                                                                                                                                                                                                                                                                                                                                                                                                                                                                                                                                                                                                                                                                                                                                                                                                                                                                                                                                                                                                                                                                                                                                                                                                                                                                                                                                                                                       |  |
|---------------------------------------------------------------------------------------------------|--------------------|------------|---------------------|---------------------------------------------------------------------------------------------------|---------------------------------------------------------------------------------------------------------------------------------------------------------------------------------------------------------------------------------------------------------------------------------------------------------------------------------------------------------------------------------------------------------------------------------------------------------------------------------------------------------------------------------------------------------------------------------------------------------------------------------------------------------------------------------------------------------------------------------------------------------------------------------------------------------------------------------------------------------------------------------------------------------------------------------------------------------------------------------------------------------------------------------------------------------------------------------------------------------------------------------------------------------------------------------------------------------------------------------------------------------------------------------------------------------------------------------------------------------------------------------------------------------------------------------------------------------------------------------------------------------------------------------------------------------------------------------------------------------------------------------------------------------------------------------------------------------------------------------------------------------------------------------------------------------------------------------------------------------------------------------------------------------------------------------------------------------------------------------------|--|
|                                                                                                   |                    |            |                     |                                                                                                   | restrictions. COVID-19 is unfolding in Africa against a backdrop of worrying levels of hunger and undernourishment which could worsen as the virus threatens livelihoods and household economies. The perspective piece addresses the crisis within crisis of COVID-19 and hunger on the well-being of children in Africa.                                                                                                                                                                                                                                                                                                                                                                                                                                                                                                                                                                                                                                                                                                                                                                                                                                                                                                                                                                                                                                                                                                                                                                                                                                                                                                                                                                                                                                                                                                                                                                                                                                                            |  |
| The risk to child nutrition during and after COVID-19 pandemic: what to expect and how to respond | Ntambara J, Chu M. | 2021-04-13 | Public Health Nutr. | <a href="https://doi.org/10.1017/s1368980021001610">https://doi.org/10.1017/s1368980021001610</a> | <p>Objective: This study aimed to address the key areas of concern for child nutrition, both during and after the COVID-19 pandemic, and proposes strategic responses to reduce child undernutrition in the short and long term.</p> <p>Design: A descriptive literature review was performed. The search of the literature was conducted through using electronic databases including PubMed, Web of science, google scholar, and Cochrane library.</p> <p>Setting: A wide range of published articles focused on child malnutrition were reviewed.</p> <p>Participants: The study was focused on children especially those under five years.</p> <p>Results: This study proposes strategic responses to reduce child undernutrition. These responses include strengthening access to community-based nutrition services that support the early detection and treatment of undernourished children and emergency food distribution, including fortified foods with vitamins and minerals, to vulnerable households, particularly those with children under five years. Moreover, counseling and promotion programs should be reinforced to revitalize community nutrition education in areas such as gestation, exclusive breastfeeding, and complementary feeding, and hygienic practices involving handwashing, proper sanitation, and other basic behavioral changes.</p> <p>Conclusions: The COVID-19 pandemic has affected many countries especially those in the regions of South Asia and sub-Saharan Africa in which there has been an ongoing burden of child undernutrition. However, malnutrition is preventable and can be eliminated through a multisectoral strategic approach. The effective execution of a multisectoral approach toward preventing childhood malnutrition will require not only a financial investment but also the collective efforts from different ministries of the governments, UN-affiliated agencies, and nongovernmental organizations.</p> |  |

|                                                                                              |                                                                 |                   |                           |                                                                                                                        |                                                                                                                                                                                                                                                                                                                                                                                                                                                                                                                                                                                                                                                                                                                                                                                                                                                                                                                                                                                                                                                                                                                                                                                                                                                                                                                                                                                                                   |                                                                                                                                                                                                                               |
|----------------------------------------------------------------------------------------------|-----------------------------------------------------------------|-------------------|---------------------------|------------------------------------------------------------------------------------------------------------------------|-------------------------------------------------------------------------------------------------------------------------------------------------------------------------------------------------------------------------------------------------------------------------------------------------------------------------------------------------------------------------------------------------------------------------------------------------------------------------------------------------------------------------------------------------------------------------------------------------------------------------------------------------------------------------------------------------------------------------------------------------------------------------------------------------------------------------------------------------------------------------------------------------------------------------------------------------------------------------------------------------------------------------------------------------------------------------------------------------------------------------------------------------------------------------------------------------------------------------------------------------------------------------------------------------------------------------------------------------------------------------------------------------------------------|-------------------------------------------------------------------------------------------------------------------------------------------------------------------------------------------------------------------------------|
| <p>Child Undernutrition in Sudan: The Social and Economic Impact and Future Perspectives</p> | <p>Abu-Fatima O, Abbas AAG, Racalbuto V, Smith L, Pizzol D.</p> | <p>2021-03-01</p> | <p>Am J Trop Med Hyg.</p> | <p><a href="https://doi.org/10.4269/ajtmh.20-1251">https://doi.org/10.4269/ajtmh.20-1251</a></p>                       | <p>The nutrition situation in Sudan is one of the worst in northeast Africa and it is characterized by persistently high levels of acute and chronic malnutrition that have increased over the last two decades. The underlying causes of malnutrition are multi-sectoral and are mainly due to inequalities, inadequate food practices, and limited access to healthcare services. Based on the report The Economic and Social Impacts of Child Undernutrition in Sudan, this study assesses the impact that malnutrition has on health, education, and productivity in Sudan. The country is estimated to have lost an equivalent of about 11.6 billion Sudanese pound in 2014, which represented 2.6% of the gross domestic product (GDP). Productivity-related losses contributed the largest costs at 1.5% of GDP followed by health and education sectors at 1.1% and 0.1%, respectively. In 2020, the outbreak of the COVID-19 pandemic further exposed the fragility of Sudan's health, social, and economic system. It is mandatory that all stakeholders address child nutrition as a main concern and stunting is incorporated in the center of the development agenda. In particular, the national development frameworks should be updated to ensure the reduction of the stunting prevalence and to put in place a comprehensive multi-sectoral nutrition policy, strategy, and plan of action.</p> | <p>The paper is not focusing specifically on how Covid-19 is a factor for an increase in child malnutrition – only mentioning this factor marginally, taking on a broader perspective on the malnutrition rates in Sudan.</p> |
| <p>The implications of COVID-19 for the children of Africa.</p>                              | <p>Mustafa, F., &amp; J Green, R.</p>                           | <p>2020-11-06</p> | <p>Afr. med. j.</p>       | <p><a href="http://dx.doi.org/10.7196/SAMJ.2020.v110i6.14824">http://dx.doi.org/10.7196/SAMJ.2020.v110i6.14824</a></p> | <p>COVID-19, and the novel coronavirus causing it, has been declared a pandemic by the World Health Organization. It presents with signs and symptoms of respiratory illness, and other nonspecific symptoms. These symptoms may be mild enough to go unnoticed, or severe enough to overwhelm a healthcare system in a First-World country. It is an emerging problem that can potentially put intolerable strain on a health system that is fragile and likely to collapse, such as those that exist in Africa. Extraordinary times like these require ingenious statesmanship and astutely calculated plans to see a nation emerge through the crisis. And in such a crisis, special attention needs to be directed to the healthcare system, where medical attention, equipment and interventions need to be carefully rationed.</p> <p>To date, sub-Saharan Africa has not seen the devastation wrought on the Northern Hemisphere. That may be fortuitous, we may be lucky, it may just be coming.</p>                                                                                                                                                                                                                                                                                                                                                                                                      | <p>The paper by Mustafa &amp; Green (2020) did not put malnutrition in the foreground, but examining on how children are impacted by a weakened healthcare system, rather</p>                                                 |

|                                                                                                                    |                                                                                |            |                                                 |                                                                                                                                                                                                                                                                                                                                           |                                                                                                                                                                                                                                                                                                                                                                                                                                                                                                                                                                                                                                                                                                                                                                                                                                                                                                                                                                                                                                                                                                                                                                                                                         |                                                                                    |
|--------------------------------------------------------------------------------------------------------------------|--------------------------------------------------------------------------------|------------|-------------------------------------------------|-------------------------------------------------------------------------------------------------------------------------------------------------------------------------------------------------------------------------------------------------------------------------------------------------------------------------------------------|-------------------------------------------------------------------------------------------------------------------------------------------------------------------------------------------------------------------------------------------------------------------------------------------------------------------------------------------------------------------------------------------------------------------------------------------------------------------------------------------------------------------------------------------------------------------------------------------------------------------------------------------------------------------------------------------------------------------------------------------------------------------------------------------------------------------------------------------------------------------------------------------------------------------------------------------------------------------------------------------------------------------------------------------------------------------------------------------------------------------------------------------------------------------------------------------------------------------------|------------------------------------------------------------------------------------|
|                                                                                                                    |                                                                                |            |                                                 |                                                                                                                                                                                                                                                                                                                                           | In addition, SARS-CoV-2 has left children largely unaffected by disease.[1] They may be the silent carriers, which could have its own awful psychological impact. But whether or not COVID-19 ultimately affects the children of Africa directly, it will leave them scarred, worse off, and still facing a burden of infectious diseases not seen anywhere else in the world.                                                                                                                                                                                                                                                                                                                                                                                                                                                                                                                                                                                                                                                                                                                                                                                                                                          | than a weakened economy/socio economic effect resulting in increased malnutrition. |
| Assessing the Zero Hunger Target Readiness in Africa in the face of COVID-19 Pandemic                              | Otekunrin, O. A., Otekunrin, O. A., Fasina, F. O., Omotayo, A. O., & Akram, M. | 2020-07-15 | Caraka Tani: Journal of Sustainable Agriculture | <a href="https://scholar.googleusercontent.com/scholar?q=cache:Dh_gtOWa9tUJ:scholar.google.com/+covid-19+and+malnutrition+in+afrikan+children&amp;hl=de&amp;as_sdt=0,5">https://scholar.googleusercontent.com/scholar?q=cache:Dh_gtOWa9tUJ:scholar.google.com/+covid-19+and+malnutrition+in+afrikan+children&amp;hl=de&amp;as_sdt=0,5</a> | Sustainable Development Goal 2 (SDG 2) is hinged on achieving zero hunger target globally, by the year 2030. Many developing countries, especially African countries, are faced with extreme hunger often caused or compounded by bad governance, conflicts and climate change. In this paper, we assess Africa's readiness towards attaining the zero hunger target by 2030 in the face of COVID-19 pandemic. Patterns of Global Hunger Index (GHI) and each of its indicators across Africa are compared before the pandemic (2000-2019). The effect of the pandemic on the hunger situation in Africa is discussed highlighting the mitigating measures put in place by selected African governments. We found that most African countries have recorded steady reduction in their child mortality rates but high prevalence of undernourishment, stunting and child wasting indicate significant challenges hampering the achievement of the zero hunger target. The study recommends that African governments should prioritise sustainable agricultural practices while serious attention should be given to the formulation and implementation of policies that reduce hunger in the face the COVID-19 pandemic. |                                                                                    |
| COVID-19 implications on household income and food security in Kenya and Uganda: Findings from a rapid assessment. | Kansiime, M. K., Tambo, J. A., Mugambi, I., Bundi, M., Kara, A., & Owuor, C.   | 2021-01    | World development                               | <a href="https://doi.org/10.1016/j.worlddev.2020.105199">https://doi.org/10.1016/j.worlddev.2020.105199</a>                                                                                                                                                                                                                               | This study assessed implications of the Coronavirus Disease 19 (COVID-19) pandemic on household income and food security in two East African countries – Kenya and Uganda, using online survey data from 442 respondents. Results show that more than two-thirds of the respondents experienced income shocks due to the COVID-19 crisis. Food security and dietary quality worsened, as measured by the food insecurity experience scale and the frequency of consumption of nutritionally-rich foods. The proportion of food insecure respondents increased by 38% and 44% in Kenya and Uganda respectively, and in both countries, the regular consumption of fruits decreased by about 30% during the COVID-19 pandemic, compared to a normal period (before the pandemic). Results from probit regressions show that the income-poor households and those                                                                                                                                                                                                                                                                                                                                                          |                                                                                    |

|                                                                                                                |                                                                                                           |                |                             |                                                                                                            |                                                                                                                                                                                                                                                                                                                                                                                                                                                                                                                                                                                                                                                                                                                                                                                                                                                                                                                                                                                                                                                                                                                                                                                                                                                           |  |
|----------------------------------------------------------------------------------------------------------------|-----------------------------------------------------------------------------------------------------------|----------------|-----------------------------|------------------------------------------------------------------------------------------------------------|-----------------------------------------------------------------------------------------------------------------------------------------------------------------------------------------------------------------------------------------------------------------------------------------------------------------------------------------------------------------------------------------------------------------------------------------------------------------------------------------------------------------------------------------------------------------------------------------------------------------------------------------------------------------------------------------------------------------------------------------------------------------------------------------------------------------------------------------------------------------------------------------------------------------------------------------------------------------------------------------------------------------------------------------------------------------------------------------------------------------------------------------------------------------------------------------------------------------------------------------------------------|--|
|                                                                                                                |                                                                                                           |                |                             |                                                                                                            | <p>dependent on labour income were more vulnerable to income shock, and had poorer food consumption during the COVID-19 pandemic compared to other respondent categories. As such, they were more likely to employ food-based coping strategies compared to those pursuing alternative livelihoods, who generally relied on savings. Farmers were less likely to experience worsened food security compared to other respondent categories who depended to a great extent on market sources for food. In both countries, participation in national social security schemes was less likely to mitigate respondents' income shock during the COVID-19 period. Conversely, membership in savings and loan groups was correlated with less likelihood of suffering income shocks and reduction in food consumption. The results suggest that ongoing and future government responses should focus on structural changes in social security by developing responsive packages to cushion members pushed into poverty by such pandemics while building strong financial institutions to support the recovery of businesses in the medium term, and ensuring the resilience of food supply chains particularly those making available nutrient-dense foods.</p> |  |
| <p>Food security and welfare changes under COVID-19 in Sub-Saharan Africa: Impacts and responses in Kenya.</p> | <p>Nechifor, V., Ramos, M. P., Ferrari, E., Laichena, J., Kihiu, E., Omanyo, D., ... &amp; Kiriga, B.</p> | <p>2021-03</p> | <p>World development</p>    | <p><a href="https://doi.org/10.1016/j.jgfs.2021.100514">https://doi.org/10.1016/j.jgfs.2021.100514</a></p> | <p>The COVID-19 pandemic has affected all Sub-Saharan economies through a multitude of impact channels. The study determines the medium-term macroeconomic outcomes of the pandemic on the Kenyan economy and links the results with a detailed food security and nutrition microsimulation module. It thus evaluates the effectiveness of the adopted government measures to reduce the negative outcomes on food security and to enable economic recovery at aggregate, sectoral and household levels. Through income support measures, the food sector and food demand partially recover. However, 1.3% of households still fall below calorie intake thresholds, many of which are in rural areas. Results also indicate that the state of food security in Kenya remains vulnerable to the evolution of the pandemic abroad.</p>                                                                                                                                                                                                                                                                                                                                                                                                                     |  |
| <p>Covid-19 lockdowns, income distribution, and food security: An</p>                                          | <p>Arndt, C., Davies, R., Gabriel, S., Harris, L., Makrelov, K.,</p>                                      | <p>2020-09</p> | <p>Global Food Security</p> | <p><a href="https://doi.org/10.1016/j.jgfs.2020.100410">https://doi.org/10.1016/j.jgfs.2020.100410</a></p> | <p>Absent vaccines and pharmaceutical interventions, the only tool available to mitigate its demographic effects is some measure of physical distancing, to reduce contagion by breaking social and economic contacts. Policy makers must balance the positive health effects of strong distancing measures, such as lockdowns, against their economic costs, especially the burdens imposed on low income and food insecure households. The distancing measures deployed by South Africa impose large economic costs and have negative implications for the factor</p>                                                                                                                                                                                                                                                                                                                                                                                                                                                                                                                                                                                                                                                                                   |  |



|                                                                                                        |                                                       |         |                                            |                                                                                         |                                                                                                                                                                                                                                                                                                                                                                                                                                                                                                                                                                                                                                                                                                                                                                                                                                                                                                                                                                                                                                                                                                                                                                                                                                                                                                                                                                                                                                                                                                                                                                                                                                                                                                                                                                                                                                                                                |  |
|--------------------------------------------------------------------------------------------------------|-------------------------------------------------------|---------|--------------------------------------------|-----------------------------------------------------------------------------------------|--------------------------------------------------------------------------------------------------------------------------------------------------------------------------------------------------------------------------------------------------------------------------------------------------------------------------------------------------------------------------------------------------------------------------------------------------------------------------------------------------------------------------------------------------------------------------------------------------------------------------------------------------------------------------------------------------------------------------------------------------------------------------------------------------------------------------------------------------------------------------------------------------------------------------------------------------------------------------------------------------------------------------------------------------------------------------------------------------------------------------------------------------------------------------------------------------------------------------------------------------------------------------------------------------------------------------------------------------------------------------------------------------------------------------------------------------------------------------------------------------------------------------------------------------------------------------------------------------------------------------------------------------------------------------------------------------------------------------------------------------------------------------------------------------------------------------------------------------------------------------------|--|
| analysis for South Africa                                                                              | Robinson, S., ... & Anderson, L.                      |         |                                            |                                                                                         | distribution of income. Labor with low education levels are much more strongly affected than labor with secondary or tertiary education. As a result, households with low levels of educational attainment and high dependence on labor income would experience an enormous real income shock that would clearly jeopardize the food security of these households. However, in South Africa, total incomes for low income households are significantly insulated by government transfer payments. From public health, income distribution and food security perspectives, the remarkably rapid and severe shocks imposed because of Covid-19 illustrate the value of having in place transfer policies that support vulnerable households in the event of 'black swan' type shocks.                                                                                                                                                                                                                                                                                                                                                                                                                                                                                                                                                                                                                                                                                                                                                                                                                                                                                                                                                                                                                                                                                            |  |
| COVID-19 pandemic and mitigation strategies: implications for maternal and child health and nutrition. | Akseer, N., Kandru, G., Keats, E. C., & Bhutta, Z. A. | 2020-08 | The American Journal of Clinical Nutrition | <a href="https://doi.org/10.1093/ajcn/nqaa171">https://doi.org/10.1093/ajcn/nqaa171</a> | Coronavirus disease 2019 (COVID-19) continues to ravage health and economic metrics globally, including progress in maternal and child nutrition. Although there has been focus on rising rates of childhood wasting in the short term, maternal and child undernutrition rates are also likely to increase as a consequence of COVID-19 and its impacts on poverty, coverage of essential interventions, and access to appropriate nutritious foods. Key sectors at particular risk of collapse or reduced efficiency in the wake of COVID-19 include food systems, incomes, and social protection, health care services for women and children, and services and access to clean water and sanitation. This review highlights key areas of concern for maternal and child nutrition during and in the aftermath of COVID-19 while providing strategic guidance for countries in their efforts to reduce maternal and child undernutrition. Rooted in learnings from the exemplars in Global Health's Stunting Reduction Exemplars project, we provide a set of recommendations that span investments in sectors that have sustained direct and indirect impact on nutrition. These include interventions to strengthen the food-supply chain and reducing food insecurity to assist those at immediate risk of food shortages. Other strategies could include targeted social safety net programs, payment deferrals, or tax breaks as well as suitable cash-support programs for the most vulnerable. Targeting the most marginalized households in rural populations and urban slums could be achieved through deploying community health workers and supporting women and community members. Community-led sanitation programs could be key to ensuring healthy household environments and reducing undernutrition. Additionally, several COVID-19 response measures such |  |

|  |  |  |  |  |                                                                                                                                                                                                                                                                                                                                                                                   |  |
|--|--|--|--|--|-----------------------------------------------------------------------------------------------------------------------------------------------------------------------------------------------------------------------------------------------------------------------------------------------------------------------------------------------------------------------------------|--|
|  |  |  |  |  | as contact tracing and self-isolation could also be exploited for nutrition protection. Global health and improvements in undernutrition will require governments, donors, and development partners to re-strategize and reprioritize investments for the COVID-19 era, and will necessitate data-driven decision making, political will and commitment, and international unity. |  |
|--|--|--|--|--|-----------------------------------------------------------------------------------------------------------------------------------------------------------------------------------------------------------------------------------------------------------------------------------------------------------------------------------------------------------------------------------|--|
